1 **Evolution of two gene networks underlying adaptation to drought stress in the wild**  
2 **tomato *Solanum chilense***

3

4 Kai Wei\*<sup>1</sup>, Saida Sharifova\*<sup>2</sup>, Neelima Sinha<sup>3</sup>, Hokuto Nakayama<sup>4</sup>, Aurélien Tellier<sup>#1</sup>, Gustavo  
5 A Silva-Arias<sup>#1,5</sup>

6 <sup>1</sup>Professorship for Population Genetics, Department of Life Science Systems, School of Life  
7 Sciences, Technical University of Munich, Liesel-Beckmann Strasse 2, 85354 Freising,  
8 Germany

9 <sup>2</sup>Department of Life Sciences, Graduate School of Science, Art and Technology, Khazar  
10 University, Mahsati 41, AZ1096, Baku, Azerbaijan

11 <sup>3</sup>Department of Plant Biology, University of California Davis, One Shields Avenue, Davis, CA  
12 95616, USA

13 <sup>4</sup>Department of Biological Sciences, The University of Tokyo, 113-0033, Tokyo, Japan

14 <sup>5</sup>Instituto de Ciencias Naturales, Facultad de Ciencias, Universidad Nacional de Colombia,  
15 Sede Bogotá, Bogotá, Colombia

16 \* these authors contributed equally

17 #Correspondence email: [aurelien.tellier@tum.de](mailto:aurelien.tellier@tum.de), [gasilvaa@unal.edu.co](mailto:gasilvaa@unal.edu.co)

18

19

## 20 **Abstract**

21 Drought stress is a key factor limiting plant growth and the colonization of arid habitats by  
22 plants. Here, we study the evolution of gene expression response to drought stress in a wild  
23 tomato, *Solanum chilense* naturally occurring around the Atacama Desert in South America.  
24 We conduct a transcriptome analysis of plants under standard and drought experimental  
25 conditions to understand the evolution of drought-response gene networks. We identify two  
26 main regulatory networks corresponding to two typical drought-responsive strategies: cell cycle  
27 and fundamental metabolic processes. We estimate the age of the genes in these networks  
28 and the age of the gene expression network, revealing that the metabolic network has a  
29 younger origin and more variable transcriptome than the cell-cycle network. Combining with  
30 analyses of population genetics, we found that a higher proportion of the metabolic network  
31 genes show signatures of recent positive selection underlying recent adaptation within *S.*  
32 *chilense*, while the cell-cycle network appears of ancient origin and is more conserved. For  
33 both networks, however, we find that genes showing older age of selective sweeps are the  
34 more connected in the network. Adaptation to southern arid habitats over the last 50,000 years  
35 occurred in *S. chilense* by adaptive changes core genes with substantial network rewiring and  
36 subsequently by smaller changes at peripheral genes.

37

38

## 39 **Introduction**

40 Drought stress is one of the major environmental constraints negatively influencing plant  
41 development and preventing plant growth, resulting in decreased yield in agriculture and as a  
42 constraining factor for colonization of arid or hyper-arid habitats (Ciais et al. 2005; Juenger  
43 2013). Plants respond to water-insufficiency through multiple strategies underpinned by  
44 various physiological and developmental processes, such as storage of internal water to avoid  
45 tissue damage and tolerance (endurance) to drought stress to maintain the growth process  
46 (Basu et al. 2016). These strategies involve many biological functions such as increasing the  
47 metabolic activity of some tissues, i.e. root water uptake and closing stomata, or activation of  
48 metabolic pathways including phytohormone signaling, antioxidant and metabolite production  
49 in order to regulate osmotic processes (Rodrigues et al. 2019). Drought response involves  
50 numerous quantitative and polygenic traits governed by many genes acting in (complex) gene  
51 co-expression networks (GCN). To improve crops and predict the evolutionary potential of plant  
52 species under the current and predicted global water deficits, it is thus of interest to pinpoint  
53 and decipher the evolutionary history of the relevant GCNs underpinning the adaptation of wild  
54 plants to arid or hyper-arid habitats (Gehan et al. 2015).

55 Comparative transcriptomics involving the inference of gene co-expression patterns  
56 show that many GCNs are conserved along the tree of life (Stuart et al. 2003; Gerstein et al.  
57 2014; Zarrineh et al. 2014; Crow et al. 2022). Moreover, phylogenetic and developmental  
58 studies have demonstrated that many physiological, structural, and regulatory innovations to  
59 cope drought stress have arisen throughout the history of plants, many of them even predating  
60 the emergence of land plants (Jill Harrison 2017; de Vries et al. 2018; de Vries and Archibald  
61 2018; Mustafin et al. 2019; Wang et al. 2020; Bowles et al. 2021). Several conserved GCNs  
62 can be observed in fundamental biological processes such as protein metabolism, cell cycle,  
63 and photosynthesis and well as key traits such wood formation (Stuart et al. 2003; Ficklin and  
64 Feltus 2011; Zinkgraf et al. 2020).

65 A key question in functional and evolutionary genomics is thus to link GCN evolution and  
66 (relatively) short-scale evolutionary processes such as adaptation and population/species  
67 divergence in order to assess the relative importance of contingency, exaptation and evolution  
68 of novel genes (duplication, neofunctionalization) allowing colonization of novel habitats. Two  
69 main hypotheses are formulated. First, highly conserved sub-networks (so-called hubs or  
70 kernels) are under strong selective constraint to ensure the functionality of the GCNs  
71 (Papakostas et al. 2014; Josephs et al. 2017; Mähler et al. 2017; Masalia et al. 2017), so that  
72 variation can only be maintained at (less connected) genes at the periphery of the GCNs that  
73 may be the target of positive natural selection (Flowers et al. 2007; Kim et al. 2007; Luisi et al.  
74 2015; Erwin 2020). However, this argument is likely based on the fact that the novel habitats  
75 may not differ much from the original one, so that only minor adjustments in the GCNs are  
76 enough to provide adaptation. This argument is in line with so-called developmental systems  
77 drift (DSD; True and Haag 2001), that predicts GCN rewiring only occurs in ‘flexible’  
78 (sub-)modules with the accumulation of neutral variation that keep the network function intact  
79 until a new viable function (phenotype or developmental pathway) appears. Second, despite  
80 the general belief that genes with higher connectivity evolve at a slower rate, there is also  
81 evidence that changes at central genes (with higher connectivity) can be responsible for the  
82 short-term response to selection (Jovelin and Phillips 2009; Luisi et al. 2015) and promote  
83 rewiring of the GCN (Koubkova-Yu et al. 2018). Thus, highly connected genes may be targets  
84 of positive selection during environmental change, e.g. adaptation to novel arid habitats, even  
85 though these genes experience purifying selection in stable environments (Hämälä et al. 2020).  
86 Indeed, if the second hypothesis is correct, we expect a correlation between the age of positive  
87 selection and the connectivity of a gene in a network, but no correlation under the first  
88 hypothesis.

89 To test this hypothesis, we reveal the selective forces (positive versus purifying selection)  
90 acting on different components of the networks (hub vs peripheral genes) across  
91 species/lineages adapted to contrasting conditions, and correlate the presence of recent

92 positive selection with gene connectivity in the wild tomato species *Solanum chilense*. Wild  
93 tomatoes are a model of interest as their diversification is accompanied by the exploration of  
94 wide environmental gradients along the Pacific coast of South America (from tropical to  
95 subtropical, coastal to high mountain, and wet to extremely dry regions; Nakazato et al. 2010;  
96 Haak et al. 2014). In addition, the infra-specific diversification within *S. chilense* resulted in  
97 several lineages with strong environmental differentiation (Raduski and Igić 2021; Wei et al.  
98 2022). Populations of *S. chilense* are challenged by prolonged drought, with the most severe  
99 drought conditions occurring in the southern part of the range (Figure 1A). Wild relative tomato  
100 species such *S. chilense*, *S. sitiens* and *S. pennellii* become well-established systems to study  
101 tolerance strategies to survive in extreme environments (Bolger et al. 2014; Martínez et al.  
102 2014; Tapia et al. 2016; Kashyap et al. 2020; Molitor et al. 2021). In a previous study, we  
103 assayed for evidence of positive selection in 30 fully sequenced genomes of *S. chilense* to  
104 identify candidate genes underpinning adaptation along the species range. We found genes  
105 with putative functions related to root hair development and cell homeostasis as being likely  
106 involved in drought stress tolerance (Wei et al. 2022). However, to date, most research in *S.*  
107 *chilense* has focused on the evolution of a few genes potentially involved in abiotic stress  
108 response (Fischer et al. 2011; Mboup et al. 2012; Fischer et al. 2013; Böndel et al. 2015;  
109 Nosenko et al. 2016; Böndel et al. 2018), and we still lack information regarding the  
110 evolutionary mechanisms driving drought tolerance in this species.

111 Our aim is to study the GCN evolution underpinning *S. chilense* adaptation to arid and  
112 hyper-arid habitats. We identify drought stress responsive gene regulatory networks combining  
113 multiple analyses of transcriptome data of *S. chilense* and focus on two networks involved in  
114 cell-cycle and metabolic processes. Furthermore, we infer the evolutionary processes at these  
115 two networks across three different time scales by computation of transcriptome indices to  
116 explore the evolutionary age and sequence divergence of the drought responsive  
117 transcriptome. We then analyze the emergence of adaptive variation in the identified drought-  
118 responsive genes of these networks and the association to gene connectivity.

## 119 **Results**

### 120 **Transcriptome analyses**

121 We analyze short-read transcriptome data from 16 libraries aligned to the reference genome  
122 of *S. chilense* (Dataset1 S1) and assess the consistency of the results by mapping to the  
123 reference genome of *S. lycopersicum* (ITAG 3.0) (Dataset2, S1). A total of 27,832 genes are  
124 identified to be expressed in the 16 libraries (Dataset1 S2), of which 1,536 genes are uniquely  
125 expressed in drought condition and 1,767 genes in control condition (Dataset1 S2). Using the  
126 ITAG 3.0 reference, we identify a total of 36,827 transcript isoforms corresponding to 15,697  
127 genes (Dataset2 S2).

128 A principal component analysis (PCA) based on the gene expression profiles reveals  
129 consistent clustering primarily associated with the experimental conditions (control and drought)  
130 and secondarily to the developmental stages (leaf and shoot apex) (Figure 1A). PC1 accounts  
131 for 79% of the expression variability and separates the libraries from the two experimental  
132 conditions, indicating transcriptome remodeling between drought and control conditions.  
133 Libraries from different developmental stages are separated along the PC2 axis (accounting  
134 for 15% of the variance), supporting tissue age transcriptome specificity. Consistently, the  
135 transcriptome similarity analysis between libraries reveals that the watering conditions explain  
136 the major differences between treatments (Figure 1B). Therefore, we thereafter focus on  
137 comparing the transcriptome profiles of the drought and control experimental conditions.

138 The gene expression profiles based on reference genome of ITAG 3.0 show similar  
139 patterns on the PCA (Figure 1A and S1A). However, the analysis of expression correlation and  
140 library clustering based on the TPM values show reduced resolution in discriminating between  
141 experimental conditions and developmental stages using the *S. lycopersicum* reference  
142 (Figure S1B-D).

143

## 144 Identification of gene networks involved in drought stress

145 We identified gene networks involved in drought response in *S. chilense* based on differential  
146 expression analysis and weighted gene co-expression network analysis (WGCNA). First, three  
147 sets of DEGs are identified from three drought/control comparison groups (full data set, only  
148 leaf and only shoot apex tissues) (Figure 2A; Dataset1 S3;  $\log_2\text{FoldChange} \geq 1$ ,  $\text{FDR } P \leq$   
149  $0.001$ ). A total of 4,905 DEGs are identified in three comparison groups, of which 2,484 DEGs  
150 (1,235 up-regulated and 1,249 down-regulated in drought transcriptome) are shared in three  
151 comparison groups (Figure 2B). We deduce that these shared DEGs correspond to a core  
152 functionally drought-responsive network. The consistency of these results is confirmed using  
153 gene expression data based on ITAG 3.0 reference genome. Similar DEGs can be identified  
154 between two reference genomes (Figure S2; Figure 2; Dataset2 S3). Although there is a  
155 notorious outlier sample (CL-A) when using reference genome of ITAG 3.0, in two shared DEG  
156 sets (2,484 DEGs based on *S. chilense* (Figure 2B), 2,585 DEGs based on ITAG 3.0 (Figure  
157 S2B)), 62.8% (1,560) DEGs still overlap (Figure S2C). This suggest that our greenhouse  
158 experiments, sequencing and parameters for differential expression analysis are highly robust.  
159 We use, thereafter, 2,484 shared DEGs based on the reference genome of *S. chilense* in the  
160 following analyses.

161 A set of 16,181 genes after filtering from all expressed genes were used in WGCNA, and  
162 clustered into seven co-expression modules named after different colors. The module sizes  
163 range from 183 up to 5,364 genes (Figure 2C, Dataset1 S4). Here, we do not directly used  
164 DEGs in WGCNA as suggested by the developer of WGCNA, because DEGs are invalid for  
165 assumption of the scale-free topology. Among the identified co-expression modules, the blue  
166 module (3,852 genes) shows significantly positive correlation with control condition and  
167 negative correlation with drought condition (Figure 2C, Kendall's test,  $P = 2.2e-11$ ). In contrast,  
168 the turquoise module (5,364 genes) is significantly positively correlated with drought condition  
169 and negatively correlated with control condition (Figure 2C, Kendall's test,  $P = 2.34e-13$ ). In  
170 addition, the genes within blue and turquoise modules are observed to show higher

171 connectivity than other modules (Figure S3, Kolmogorov-Smirnov test on connectivity  
172 measure,  $P = 2.41e-17$ ), indicating higher interaction and closer correspondence in biological  
173 process among genes within each module in response to water deprivation.

174 We check the overlap between DEGs and modules to confirm that blue and turquoise  
175 modules are associated with drought stress in *S. chilense* (Table S1). DEGs share more genes  
176 with the blue and turquoise modules than with other co-expression modules. Almost all shared  
177 DEGs (2,302 genes out of 2,484) are found in the blue and turquoise modules. This confirms  
178 that blue and turquoise modules are two sets of co-expressed drought stress responsive genes.  
179 The overlapping DEGs and module genes are extracted to constitute the now refined two high-  
180 confidence subsets of the blue and turquoise modules and comprising 1,223 and 1,079 genes,  
181 respectively. The co-expression analysis with the ITAG 3.0 reference genome show consistent  
182 results and obtain eight co-expression modules (Figure S2D; Dataset2 S4), with two  
183 significantly correlated modules with drought stress (blue module shows negative correlation,  
184 and turquoise module shows positive correlation; Figure S2D), and show high overlapped ratio  
185 with DEGs based on ITAG 3.0 (Table S2).

186 To confirm regulatory relationships among genes in the two co-expression networks, we  
187 identify transcription factors (TFs) and transcription factor binding sites (TFBSs) for the two  
188 subsets of genes. Then, we extract the genes that can bind to one another (Table S3) from the  
189 two high-confidence subsets, which we hereafter name as sub-blue (686 genes) and sub-  
190 turquoise (948 genes), respectively (Dataset1 S5). The genes in the sub-blue and sub-  
191 turquoise networks not only show differential expression and specific co-expression patterns  
192 at the gene expression level, but we can also confirm that these interact as predicted by the  
193 DNA sequence and protein level. Subsequently, the co-expression network is reconstructed  
194 using the same steps for the set of genes of the sub-blue and sub-turquoise networks. Higher  
195 connectivity is observed in the sub-turquoise network (Figure S4, Kolmogorov-Smirnov test on  
196 connectivity measure,  $P = 0.002$ ), suggesting a closer regulatory relationship among genes in  
197 the sub-turquoise than in the sub-blue network. This may be due to more composite TF/TFBS



198 relationships and functions in the sub-turquoise network (Table S3; Table S4). In a  
199 complementary analysis, we also obtain networks based on reference genome of ITAG 3.0  
200 (Dataset2 S5) and check shared genes between final networks obtained based two different  
201 reference genomes, and the results show that more than half of the genes are overlapping in  
202 two networks, respectively (Figure S5). The two networks (Dataset1 S5) based on the  
203 reference genome of *S. chilense* are used for subsequent analysis.

#### 204 **Functional enrichment analysis of drought-responsive GCNs**

205 We assess whether the two identified gene networks (sub-blue and sub-turquoise) show  
206 functional differences. The gene ontology (GO) enrichment reveals that sub-blue network is  
207 significantly enriched ( $P < 0.05$ ) in cell cycle and regulation biological processes, including  
208 replication and modification of genetic information, ribosome production and assembly,  
209 cytoskeleton organization, among others (Figure 3A; Table S4). Conversely, the sub-turquoise  
210 network is enriched in biological processes related to response of physiological and metabolic  
211 processes to water shortage and heat, including some metabolic processes, signal pathways,  
212 changes of stomata and cuticle, amongst other processes (Figure 3A; Table S4). These  
213 differences of function thus suggest that genes in the two sub-networks are activated and  
214 expressed in different cellular compartments. Consistent with the biological process above  
215 mentioned, the sub-blue network genes are mainly enriched in cellular components in the  
216 nucleus, including nucleolus, chromosome, nuclear envelope, and ribosome (Figure 3B; Table  
217 S5). These cellular components are at the center of cell division processes. On the other hand,  
218 the sub-turquoise network is enriched in cellular components related to metabolism processes,  
219 such as complexes and membrane structures in the cell (Figure 3B; Table S5). We also check  
220 GO terms enriched in the two gene networks based on reference genome of ITAG 3.0.  
221 Although ITAG 3.0 does not share all drought-responsive genes with gene networks based on  
222 reference genome of *S. chilense*, almost all of GO terms are consistent between networks  
223 based on two different reference genomes (Table S4; Dataset2 S6). This indicates that  
224 modulation in the cell cycle and fundamental metabolism are two main strategies in response

225 to drought stress in *S. chilense*. We focus, thereafter, on these two sub-networks and from now  
226 on, the sub-blue network is referred to as the *cell-cycle network* and the sub-turquoise as the  
227 *metabolic network*.

## 228 **Evolutionary age of drought-responsive transcriptome in *S. chilense***

229 To generate a comprehensive understanding of the emergence of the identified drought-  
230 responsive GCNs, we estimate the transcriptome ages of the identified cell cycle and  
231 fundamental metabolism networks. For that, we build phylostratigraphic profiles for all genes  
232 of the two GCNs, summarizing the gene emergence in 18 stages of plant evolution or  
233 phylostrata (PS): PS1 representing the emergence of oldest genes (at the time of the first  
234 cellular organisms) to PS18 for the most recent genes present only in *S. chilense*. The PS18  
235 shares no homologue genes with any other species in the nr (non-redundant protein)  
236 databases of NCBI (Figure 4A and 4B, Dataset1 S6). Most genes in the two analyzed GCNs  
237 (76.79% in metabolic network and 65.45% in cell-cycle network) are assigned to three main  
238 PS, Cellular organisms (PS1), Land plants (Embryophyta; PS5) and Flowering plants  
239 (Magnoliopsida; PS8) (Figure 4A). This suggests that the two drought-responsive GCNs we  
240 identify have an ancient origin and the components are fairly conserved across the tree of  
241 life/plants. Therefore, many drought-responsive pathways likely emerged during the  
242 colonization of land by plants (PS5), but many others could derive from exaptation processes  
243 from GCNs involved in the core cell process (PS1) or reproductive organ differentiation of  
244 flowering plants (PS8). Interestingly, the cell-cycle network shows older origin ages (with more  
245 genes arising within the PS1-3), while the metabolic network presents a larger proportion of  
246 genes originating in PS8 (Figure 4A and 4B). Under drought conditions, we also find that cell-  
247 cycle network genes of almost all PS ages are down-regulated, while genes of the metabolic  
248 network are up-regulated (Figure S6).

249 Furthermore, we estimate the age of cell-cycle and metabolic GCNs using the  
250 transcriptome age index (TAI). The mean evolutionary ages of the transcriptomes are

251 significantly different between drought and control conditions (Figure 4C; Kolmogorov-Smirnov  
252 test,  $P = 0.03$ ). The TAI profile would be expected to be a flat horizontal line if the ages of  
253 genes are the same across the transcriptomes. In addition, a higher TAI value implies that  
254 evolutionary younger genes are preferentially expressed at the corresponding  
255 condition/developmental stage. We observe higher TAI in drought samples, supporting that the  
256 drought-responsive genes exhibit a younger transcriptome age than genes expressed under  
257 control conditions. Moreover, TAI of the metabolic GCN is significantly higher than the cell-  
258 cycle (Figure 4C; Kolmogorov-Smirnov test,  $P = 12.51e-7$ ), supporting the previous result that  
259 transcriptome ages of the genes in the cell-cycle are older than in the metabolic GCNs.

260 The contributions of the different PS to the TAI profiles also show notable patterns  
261 between the cell-cycle and metabolic GCNs (Figure 4D and 4E). On the one hand, early  
262 divergent genes (PS1 to PS7) show more constant transcriptome age in all conditions and the  
263 genes with ages in PS1, PS5 and PS8 appeared as remarkably important in two GCNs. On  
264 the other hand, late-emerging genes (PS8 to PS18) contribute increasingly with their age to  
265 the differential expression patterns between control and drought samples, indicating that  
266 younger drought-responsive genes are differentially expressed under drought stress in both  
267 GCNs (as observed in Domazet-Lošo and Tautz 2010; Piasecka et al. 2013). Remarkably, the  
268 youngest genes in PS18, *i.e.* specific to *S. chilense*, also present a higher contribution in the  
269 metabolic GCN, suggesting that these genes are involved in either speciation or local  
270 adaptation of *S. chilense* to drought conditions. Note that younger genes (PS9 to PS18) in the  
271 cell-cycle GCN hardly contribute to the TAI profile (Figure 4D and 4E).

## 272 **Divergence of the drought tolerance transcriptome in *S. chilense***

273 To drill down into the evaluation of the drought-response mechanisms over the time scale of  
274 *S. chilense* divergence, we calculate the TDI index, which represents the mean sequence  
275 divergence of a transcriptome. A total of 10 divergence strata (DS) are constructed based on  
276 the sequence divergence between genes of *S. chilense* and the close relative *S. pennellii* by

277 computing the Ka/Ks ratio (Figure 5A; Figure S7; Dataset1 S6). The distributions of the Ka/Ks  
278 ratio per gene for both GCNs indicate the action of purifying selection, which confirms the  
279 conservation of most of drought-responsive genes at the close-related species level.  
280 Consistent with the phylostratigraphic patterns, the purifying selection signals in the cell-cycle  
281 GCN ( $Ka/Ks = 0.279 \pm 0.333$ ) are stronger than in the metabolic GCN ( $Ka/Ks = 0.329 \pm 0.331$ )  
282 (Figure 5A; Table S6). In addition, higher TDI values are observed in the drought samples  
283 (Figure 5B) suggesting that the expressed genes we identify in the two GCNs exhibit a more  
284 conserved transcriptome profile in control condition compared to drought conditions  
285 (Kolmogorov-Smirnov test,  $P = 0.04$ ). This result supports that different selective pressures act  
286 on *S. chilense* GCNs across conditions. In accordance with the TAI results, the transcriptome  
287 of the metabolic GCN appears to exhibit a higher transcriptome divergence than the cell-cycle  
288 GCN (Figure 5B; Kolmogorov-Smirnov test,  $P = 2.25e-7$ ). Moreover, the low TDI in the cell-  
289 cycle GCN and larger TDI differences between drought and control transcriptomes also  
290 suggest that regulation of the cell-cycle is likely an ancestral (older) strategy of stress response.  
291 Alternatively, it is also possible that the transcriptome of the cell-cycle GCN may have been  
292 evolving and changing in older times, and reached a conserved structure in recent times.  
293 Conversely, changes of metabolic pathways and rewiring of the metabolic GCN may appear  
294 to be more pronounced and/or common in recent times.

295 The contributions of the low divergence DS classes (low Ka/Ks in DS1 to DS5) in the  
296 cell-cycle GCN (~ 50% of the genes) are larger than in the metabolic GCN (DS1 to DS5 about  
297 30%), especially in DS1 (lowest Ka/Ks ratio; Figure 5C and 5D). This indicates that purifying  
298 selection pressure is acting on genes of the cell-cycle GCN, possibly constraining further  
299 changes. In contrast, the metabolic network genes show about 70% contributions in high DS  
300 (higher Ka/Ks ratio in DS6 to DS10), especially in DS10 (highest Ka/Ks ratio), indicating that  
301 genes in the metabolic network evolve under weaker purifying selection pressure and that  
302 recent evolutionary changes occurred. For the cell-cycle network, the TAI profile is almost  
303 entirely composed of older phylostrata (PS1 to PS8), while new genes contribute about 20%

304 to the TAI profile of the metabolic network (Figure 4D and 4E). This indicates that the gene  
305 expression levels of the cell-cycle network have likely been optimized and fixed early on during  
306 evolution as an adaptive strategy to cope drought stress (Harrison et al. 2012). TDI profiles  
307 support this claim: conserved genes do contribute more to the TDI profiles in cell-cycle  
308 networks and show adaptive changes in expression for drought response (higher TDI  
309 difference between control and drought transcriptomes in cell-cycle network, Figure 6B). In  
310 contrast, drought-responsive genes in metabolism network appear unstable in their expression  
311 in response to drought stress, because this strategy may be linked to an initial response to  
312 severe water scarcity (Dubois and Inzé 2020).

### 313 **Population genetics analysis of drought-responsive networks**

314 We also study the selective forces acting on the identified drought-responsive gene networks  
315 at the intraspecific time scale. Using full genome sequences of six *S. chilense* populations  
316 (C\_LA1963, C\_LA3111, C\_LA2931, SC\_LA2932, SC\_LA4107, and SH\_LA4330; five plants  
317 each) recently reported in (Wei et al. 2022) aligned to the reference genome of *S. chilense*, we  
318 identify 45,208,263 high-quality single-nucleotide variants (SNPs), in which 111,606 SNPs are  
319 found in genes of the cell-cycle GCN and 167,334 SNPs in genes of the metabolic GCN. We  
320 first compare population structure between the whole-genome data and drought-responsive  
321 genes (Figure S8). The results corroborate the genetic structure revealed in (Wei et al. 2022)  
322 based on the sequence alignment to *S. pennellii* reference (Figure S8A and S8C). However,  
323 the structure exhibited by drought genes shows stronger differentiation among populations,  
324 especially to SH\_LA4330, than the WGS data (especially for clustering of populations of the  
325 central region). Moreover, the strong differences from WGS data between the two south  
326 coastal populations (SC\_LA2932 and SC\_LA4107) is attenuated when analyzing SNPs from  
327 the drought-responsive genes (Figure S8B and S8D).

328 We find that the mean nucleotide diversity ( $\pi$ ) per gene does not differ between the two  
329 GCNs (Figure S9A; Table S6; Kolmogorov-Smirnov test,  $P = 0.15$ ). In addition, the  $\pi$  values of

330 the promoter regions (2kb upstream of the transcription initiation site) are significantly higher  
331 than those of the gene (coding) regions (Figure S9A; Table S6; Kolmogorov-Smirnov test,  $P =$   
332 0.03). This result may be due to relaxed selective constrain in promoter regions while possibly  
333 explaining why few TFs can bind to multiple genes in the GCN (Table S3). TFs are indeed  
334 conserved at the coding sequence level, especially at the functional domains, but higher  
335 amount of polymorphism of TF binding sites in the promoter can be indicative of complex and  
336 diverse regulation, for example in response to stressful conditions (Spivakov 2014; Sato et al.  
337 2016). Albeit, there is no difference in the nucleotide diversity at the promoter regions between  
338 the two GCNs (Figure S9A; Table S6).

339 Furthermore, the genes for the metabolic GCN show lower Tajima's D values than those  
340 of the cell-cycle GCN (Figure S9B; Table S6; Kolmogorov-Smirnov test,  $P = 0.04$ ), suggesting  
341 more prevalent recent positive or negative selection pressure in the metabolic GCN. There is  
342 a very weak correlation between Tajima's D and Ka/Ks ratio for the cell-cycle GCN and  
343 absence of correlation for the metabolic GCN (Figure S10A and S10B). As a negative  
344 correlation between Tajima's D and Ka/Ks ratio is indicative of possible recent positive  
345 selection, the results could slightly hint to the occurrence of recent positive selection acting at  
346 more genes of the metabolic GCN (Figure S9B; Table S6).

347 We further find significant, but opposite, correlations between nucleotide  
348 diversity/Tajima's D and the contributions of the different DS for the two GCNs (Figure S10C  
349 and S10D). In the cell-cycle GCN, the contributions of different DS have significant positive  
350 correlation with nucleotide diversity and Tajima's D (Figure S10C and S10E). This indicates  
351 that DS of high contribution to TDI profiles show high nucleotide diversity (and positive Tajima's  
352 D), meaning that older genes are under stronger purifying selection than younger genes in this  
353 network because the sequence divergence of cell-cycle genes occurred at old time periods. In  
354 contrast, a negative correlation is observed between the contribution of each DS and  
355 nucleotide diversity or Tajima's D in the metabolic network (Figure S10D and S10F). Hence,  
356 DS with high contribution show low nucleotide diversity and low Tajima's D, especially DS10.

357 Therefore, it appears likely that the metabolic genes, which may be recently evolved, may be  
358 under recent positive selection due to the recent evolution of the drought response  
359 transcriptome.

### 360 **Drought-responsive genes under positive selection promote adaptive evolution in** 361 **response to drought stress**

362 Genome scan analyses have been recently used to detect candidate genes under positive  
363 selection in six populations of *S. chilense* (Wei et al. 2022). We search for overlap between  
364 genes of two drought-response GCNs studied here and our previously identified 799 candidate  
365 genes under positive selection (Wei et al. 2022). We find 74 and 126 drought-responsive genes  
366 in the cell-cycle and metabolic networks, respectively under the list of positive selection  
367 candidate genes (Figure 6A; Table S7). This indicates that drought stress is likely an important  
368 driver of adaptation and these drought-response genes may play key roles for colonization of  
369 new arid or hyper-arid habitats. Similar numbers of drought-responsive genes likely under  
370 selection are observed across different populations of *S. chilense* encompassing different parts  
371 of the range, except for SH\_LA4330 (Wei et al. 2022). The number of candidate genes  
372 belonging to the metabolic or cell-cycle GCNs is similar in the three central populations  
373 (C\_LA1963, C\_LA3111 and C\_LA2931) (Figure 6A; Table S7). The most recent diverged  
374 highland population (SH\_LA4330) contains the largest number of positively selected drought-  
375 responsive genes (Figure 6A; Table S7) with a similar proportion of genes from both networks.  
376 Noticeably, in the two south-coast populations (SC\_LA2932 and SC\_LA4107) a large majority  
377 of genes under positive selection belong to the metabolic GCN (showing absence of cell-cycle  
378 genes in population SC\_LA2932, Figure 6A; Table S7).

379 Previous studies have demonstrated that positively selected genes exhibit pleiotropy in  
380 local adaptation, and proposed connectivity of molecular networks for quantifying pleiotropic  
381 effects (Wagner et al. 2007; Erwin and Davidson 2009; Hämälä et al. 2020). To address the  
382 role that (putatively) positively selected genes play in drought-responsive networks, we



383 compare the gene connectivity of our candidate genes under selection in the two networks  
384 (Figure 6B; Table S8). In the metabolic network, the connectivity of positively selected genes  
385 ( $0.55 \pm 0.10$ ) is significantly higher than other drought-responsive genes ( $0.44 \pm 0.12$ ) (Figure  
386 S11A; Kolmogorov-Smirnov test,  $P = 0.017$ ), but we do not observe such significant difference  
387 for the cell-cycle network (Figure S11A; Kolmogorov-Smirnov test,  $P = 0.43$ ). Furthermore, the  
388 connectivity of positively selected genes of the metabolic network is much higher than those  
389 from the cell-cycle network in six populations (Figure 6B; Table S8; Kolmogorov-Smirnov test,  
390  $P = 0.007$ ). This result suggest that highly pleiotropic genes in the metabolic GCN may have  
391 facilitated the recent colonization of new habitats (Hämälä et al. 2020) during the divergence  
392 process of *S. chilense*. In contrast, the connectivity of positively selected genes in the cell-  
393 cycle network is significantly lower (Figure S11A). Therefore, we suggest that the two networks  
394 underwent different evolutionary selective pressures during the range expansion of *S. chilense*.

395 Finally, we compare the age of the selective sweep at the candidate genes of the two  
396 GCNs based on the results in Wei et al. (2022). We find that sweep ages at the cell-cycle  
397 genes are slightly younger than at those of the metabolic network, especially in the three  
398 highland populations (C\_LA2931, C\_LA3111 and SH\_LA4330; Figure S11B and S11C; Table  
399 S8). This suggest that drought adaptation is in line with the inferences of demography and  
400 colonization found in our previous studies (Stam et al. 2019; Wei et al. 2022). Interestingly, we  
401 find significantly positive correlation between the age of the sweep and gene connectivity for  
402 both GCNs and across all six populations (Figure 6C). Figure 6D and 6E provide the  
403 visualizations of two networks and exhibit the relationship between sweep age and connectivity  
404 (with weighted connection strength greater than 0.65 between any two genes). In other words,  
405 it appears that selective sweeps tend to happen first at more connected genes and,  
406 subsequently at less connected genes, during the history of colonization/adaptation of new  
407 arid habitats. To our knowledge, this is the first report of a correlation between the age of a  
408 selective sweep and the connectivity of genes in a network. To obtain more evidence to support  
409 this inference, we also calculate the tMRCA (time to most recent common ancestor) to estimate



410 the age of drought-responsive genes based on allele frequency of SNPs. The positive  
411 correlation between tMRCA of drought-responsive genes under the positive selection and  
412 connectivity also is observed (Pearson's  $cor=0.69$ ,  $P = 2.47e-5$ ), consistent with the correlation  
413 with sweep age. Moreover, the low correlation (Pearson's  $cor=0.31$ ,  $P = 0.14$ ) is observed  
414 between tMRCA of other (non-sweep) drought-responsive genes and connectivity. This may  
415 indicate a pattern of polygenic adaptation in GCNs where the positive selection acts first on  
416 core genes (high connectivity) of networks, and subsequently on the marginal genes (less  
417 connectivity). These positively selected genes ultimately regulate the expression of other  
418 genes in the network.

419

## 420 **Discussion**

421 In this study, we identify two drought-responsive GCNs by analyzing gene expression profiles  
422 of plants growing under control and drought conditions. Two GCNs involved in cell-cycle and  
423 metabolic biological processes are detected and their structural relevance are confirmed by  
424 TF/TFBS predictions. These networks represent two different strategies for drought response  
425 (Farooq et al. 2009; Danilevskaya et al. 2019). We then demonstrate that the cell-cycle network  
426 is evolutionary older and more conserved than the metabolic network. Despite the ancient  
427 history of these two GCNs, we further show that both GCNs contribute to the recent history of  
428 adaptation to drought conditions (aridity) when *S. chilense* colonizes new habitats around the  
429 Atacama desert. The joint analyses of genomic and transcriptomic data indicates that 1) at the  
430 transcriptome level, metabolic GCN is more sensitive to mutation with younger selection  
431 events in response to new environments, 2) cell-cycle GCN is less evolvable, explaining the  
432 more divergent transcriptome between drought and normal conditions, and 3) both networks  
433 still present signals of evolution under positive selection in core elements of the GCN, while  
434 peripheral genes of the network can be involved adaptation in later stages of the colonization  
435 processes.

## 436 **Drought tolerance is mediated by regulation in cell proliferation and metabolism**

437 The organ development can be roughly divided into cell proliferation and cell expansion, with  
438 water deficit being a limiting factor for both processes (Alves and Setter 2004; Verelst et al.  
439 2013). Drought stress reduces the activity of the cell cycle and thus slows down the growth  
440 and development of plants. The down-regulated genes we find in the cell-cycle network also  
441 indicate that genes related to cell cycle are suppressed by drought stress possibly to restrict  
442 the cell division in *S. chilense*. Reduction of cell number due to mild drought stress is found in  
443 *A. thaliana* (Skiryecz and Inzé 2010). This means that the cell-cycle response to drought may  
444 be very general and indirect. However, our speculations are mainly based on the aboveground  
445 tissues of *S. chilense*. The changes of fundamental metabolic activity may be a more early and  
446 variable drought-responsive strategy presumably related to an acclimation response (Harb et  
447 al. 2010). Plant water shortage is first reflected in changes in metabolic processes, such as  
448 accelerating the catabolism of macromolecules in order to regulate the penetration of tissues,  
449 to maintain physiological water balance, or slowing down metabolism to reduce energy and  
450 water consumption (Reddy et al. 2004; Gupta et al. 2020). In addition, the signaling pathways  
451 related to the metabolic gene network are also demonstrated to be a response to drought  
452 stress, for example, the abscisic acid (ABA) signaling pathway regulates the response to  
453 dehydration and optimizes water utilization (Harb et al. 2010; Wilkinson and Davies 2010).  
454 Although these two GCNs correspond to two different strategies of drought response, they are  
455 not isolated, but interact with one another in a time-dependent manner. Water deprivation and  
456 heat first change the metabolic processes leading to stomata closure, which leads then to cell  
457 cycle network to be affected under long-term lack of water. In return, the increased or  
458 decreased cell cycle gene expression affects the further physiology and metabolism of the  
459 plant (Gupta et al. 2020). Indeed, drought-responsive strategies regulating the cell cycle  
460 appear to be activated later than metabolism processes, as glucose metabolism rapidly follows  
461 drought stress, whereas the accumulation of amino acids which is a crucial part of the cell  
462 cycle response starts at a later time in response to drought (Fàbregas and Fernie 2019).

## 463 **Rewiring of ancient GCNs drives recent adaptation to dry environments**

464 The phylostratigraphic analyses support that most drought-responsive genes in *S. chilense*  
465 originated in the early to middle stages of plant evolutionary history. This is consistent with the  
466 time of origin of multiple abiotic response genes in *Arabidopsis thaliana* (Mustafin et al. 2019).  
467 The divergence times of land plants and flowering plants are important periods for the origin  
468 drought-responsive genes. The divergence of main plant groups have been linked to recurrent  
469 whole genome duplication events that promoted gene family expansions, gene neo- and sub-  
470 functionalization and genome rearrangements (Wang et al. 2012; Clark and Donoghue 2018).  
471 Those genomic processes likely promote the enrichment of drought-responsive GCNs. For  
472 instance, key drought-response morphological traits such stomata are present in the ancestral  
473 land plant. However, stomatal genes predate the divergence of land plants showing multiple  
474 duplications along the evolution of the group, and their response to environmental cues such  
475 humidity, light, CO<sub>2</sub> and ABA are widely distributed and possibly ancestral to land plants (Clark  
476 et al. 2022). Therefore, we suggest that our two drought-responsive networks were mainly  
477 shaped before or along the divergence of land plants and expanded subsequently.

478 Previous studies show that TAI and TDI profiles across embryogenesis, seed  
479 germination and transition to flowering in *A. thaliana* exhibit a 'hourglass pattern' (older and  
480 conserved transcriptomes are preferentially active at the mid-development stages; Quint et al.  
481 2012; Drost et al. 2016). Though, our TAI/TDI profiles for the two developmental stages remain  
482 stable under the same conditions (Figures 4C and 5B). The similar TAI/TDI between  
483 developmental stages we obtained is certainly because our analyses focused on two modules  
484 (co-expressed genes) highly correlated to the differential expression between drought and  
485 control conditions (Figure S2D). Therefore, developmental stage-specific response genes are  
486 underrepresented in the two analyzed networks. However, increased TAI/TDI values under  
487 drought conditions suggest that stress response transcriptomes are composed of relatively  
488 more recently diverged genes, and therefore are more evolvable. We then highlight that this  
489 inference needs to be verified in other stress responsive transcriptomes (salt, heat, cold, etc.).

490 We then speculate, that although abiotic stress response regulatory networks are mostly  
491 composed of highly ancient and conserved elements across species (Chen and Zhu 2004),  
492 networks retain the ability to change expression patterns to respond rapidly to environmental  
493 changes or explore new ecological niches. Moreover, given the pleiotropic nature of the abiotic  
494 stress-response traits, we can expect shared patterns of evolution (at the constitutive and  
495 expression components) of the networks for different stress conditions (and possible trade-offs  
496 between traits and GCNs).

497 Extensive network rewiring in relatively recent and short time-frames have been found in  
498 maize and tomato in response to domestication (Swanson-Wagner et al. 2012; Koenig et al.  
499 2013). It is therefore not surprising to find signs of adaptive variation in core elements of rather  
500 conserved regulatory networks related to the colonization processes of new habitats. The  
501 genetic (and morphological) divergence of the southern populations, southern coastal and  
502 highland marginal, is recent but strong (Raduski and Igić 2021). It is congruent with theoretical  
503 results showing that gene networks with higher mutation sensitivity (more evolvable) can  
504 facilitate local adaptation, increasing gene expression and lead to accelerated range  
505 expansion processes in abiotic environmental gradients (Deshpande and Fronhofer 2022).  
506 Complementarily, our empirical approach shows the existence of two regulatory networks with  
507 different evolutionary tendencies, one more conserved than the other and with different gene  
508 expression responses. One GCN would exhibit a faster and more variable response  
509 (metabolic) and the other a later (delayed) but more constitutive response (cell-cycle) to  
510 drought. Despite the differences in gene age and variation between the networks, our results  
511 show that both GCNs have undergone sufficient changes leading to their rewiring during the  
512 divergent process of colonization of *S. chilense* around the Atacama. Nevertheless, genes in  
513 the metabolic network show more recent evolution, with new genes members appearing in *S.*  
514 *chilense*, concomitantly with more variable expression in the drought transcriptome.

515 These drought-responsive genes to *S. chilense* likely facilitated the adaptation of this  
516 species to unique arid and hyper-arid habitats, especially when colonizing the southern part of

517 the range. Indeed, population structure based on SNPs indicates that drought-responsive  
518 genes reflected adaptation/colonization to arid habitats in *S. chilense* (Figure S8). Importantly,  
519 we found about 200 drought-responsive genes previously identified as candidate genes under  
520 positive selection (i.e. located within sweep regions; Wei et al. 2022). This confirms that  
521 drought stress is an important driver of ecological divergence in *S. chilense*. We finally provide  
522 some indirect evidence that changes at central genes (with higher connectivity) can be  
523 responsible for the short-term response to selection (Jovelin and Phillips 2009; Luisi et al. 2015)  
524 and promote rewiring of the gene network (Koubkova-Yu et al. 2018). Thus, highly connected  
525 genes may be targets of positive selection during the first phase of the environmental change  
526 or colonization to contrasting environments, and may be keys for 'piggybacking', defined as  
527 the change in gene expression of a focal gene driving phenotypic change.

528

## 529 **Limitations and further work**

530 A limitation of our gene expression study is that our transcriptomic analyses are based on  
531 individuals from a single location (near the putative region of origin of the species; Wei et al.  
532 2022), while variability in gene expression and phenotypic response has been observed  
533 between different populations (Mboup et al. 2012; Fischer et al. 2013; Nosenko et al. 2016).  
534 Further expression studies including plants from multiple locations would be useful to verify  
535 that the identified GCNs are also present and expressed in other populations and study the  
536 possible variation in the most southern populations. More evidence based on multiple  
537 populations is needed to confirm the 'piggybacking' phenomenon of gene expression in *S.*  
538 *chilense*. Additional support on the variability of transcriptome evolution across populations as  
539 well as long read sequencing of more genomes will be beneficial in assessing the role of gene  
540 duplication and gene deletion yielding the evolution of the gene networks. Such studies would  
541 also allow the analysis of evolution of adaptive gene networks and polygenic selection  
542 occurring for complex traits such as drought tolerance. Finally, more detailed studies with a

543 larger sample size from the field will help to discover other gene networks and their interactions  
544 related to abiotic stress and the evolution of the species. A detailed discussion of the potential  
545 biases associated with the use of multiplied accessions at TGRC (Tomato Genetics Resource  
546 Center, UC Davis, USA) compared to samples from natural populations is found in Wei et al.  
547 (2022). Sampling and experimental work in the field would improve the resolution of  
548 transcriptome and genomic studies, in order to assess phenotypic differences between organs  
549 and stages of development and thus extend the knowledge to other relevant characteristics  
550 such as secondary metabolism, which is known to have relevant influence on biotic and abiotic  
551 interactions (Mes et al. 2008; Bolger et al. 2014; Tapia et al. 2022).

552

## 553 **Material and methods**

### 554 **Plant material and drought stress experiment**

555 Seeds of *S. chilense* accession LA1963 were acquired from Tomato Genetics Resource Center  
556 (TGRC), University of California at Davis. Seeds were soaked in 50% household bleach (2.7%  
557 sodium hypochlorite) for 30 minutes and rinsed thoroughly with water according to instructions  
558 provided by TGRC. The rinsed seeds were sown into pots containing sterilized soil with perlite  
559 and sand (1:2) and grown under controlled conditions (22C day/20C night, 16h light/8h dark  
560 photoperiod). On the 24th day after sowing, all plants were randomly distributed into two  
561 groups and watered with a sufficient volume to reach the bottom of containers (30-40 ml). The  
562 first group of plants were maintained under normal watering condition, watered with a sufficient  
563 volume of water (50-55 ml) on 4, 7 and 11 days after start of the experiment (day 24). A  
564 moderate water stress regime was imposed for second group of plants by stopping irrigation  
565 for 7 days followed by re-watering with 25 ml of water. On day 12, newly expanded leaf (1-1.5  
566 cm length) and shoot apices with immediately surrounding leaf primordia (shoot apices and  
567 P1-P5 leaf primordia) from each group were dissected carefully using razor blades and  
568 immediately grounded into fine powder in liquid nitrogen for RNA extraction. Four biological

569 replicates were used for all RNA-Seq experiments from each tissue type. Each replicate of leaf  
570 and shoot apex included the pooled tissues from five and six plants, respectively.

### 571 **RNA extraction and cDNA library construction**

572 Libraries were constructed and named as follows: leaves under control (optimal watering)  
573 condition (CL-A to D), shoot apices under control condition (CSA-E to H), leaves under drought  
574 condition (DL-I to L), and shoot apices under drought condition (DSA-M to P). Tissues were  
575 lysed using zircon beads in Lysate Binding Buffer containing Sodium Dodecyl Sulfate. mRNA  
576 was isolated from 200 µl of lysate per sample with streptavidin coated magnetic beads for  
577 indexed non-strand specific RNA-Seq library preparation according to the method described  
578 by (Kumar et al. 2012). 1 µl of 12.5 µM of 5-prime biotinylated polyT oligonucleotide and  
579 streptavidin-coated magnetic beads were used to capture mRNA and isolate captured mRNAs  
580 from the lysate, respectively. Equal amount of mRNA of each experimental group were used  
581 to construct 16 libraries. For library construction the rapid version of Kumar et al. (2012) RNA-  
582 sequencing method (Townesley et al. 2015) was used. Each sample was barcoded using  
583 standard Illumina adaptors 1-16 to allow up to 16 samples to be pooled in one lane of  
584 sequencing on Illumina HiSeq4000. The libraries were eluted from the pellet with 10 µl 10 mM  
585 Tris pH 8.0 and pooled as described by Kumar et al. (2012). Quantification and quality  
586 assessment of resulting libraries were performed on Fragment Analyzer (FGL\_DNF-474-2- HS  
587 NGS Fragment 1-6000bp.mthds) and sequenced using the Illumina HiSeq 4000 platform to  
588 generate 100 bp single-end reads at the Vincent J. Coates Genomic Sequencing Facility at  
589 UC Berkeley.

### 590 **Transcriptome and genome data processing and mapping**

591 For transcriptome data, the adapters were removed from raw reads by two consecutive rounds  
592 using BBDuk in BBTools v38.90 (Bushnell 2014). Two sets of parameters were used in two  
593 rounds respectively: first round 'ktrim=r k=21 mink=11 hdist=2 tpe tbo minlength=21  
594 trimpolya=4'; second round 'ktrim=r k=19 mink=9 hdist=1 tpe tbo minlength=21 trimpolya=4'.



595 Then Low-quality reads were also removed with BBDuk using parameters 'k=31 hdist=1  
596 qtrim=lr trimq=10 maq=12 minlength=21 maxns=5 zipllevel=5'. The clean reads of each sample  
597 were mapped to the *S. chilense* reference genome (Silva-Arias et al. submitted) using BMap  
598 in BBTools. The SAM files were then converted and sorted to BAM files using Samtools v1.11  
599 (Wysoker et al. 2009). The number of reads were mapped to each gene were counted via  
600 featureCounts v2.0.1 in each sample (Liao et al. 2014). To eliminate the differences between  
601 samples, the gene expression level was normalized using the TPM (Transcripts Per Kilobase  
602 Million) method (Wagner et al. 2012). In addition, the transcriptome data also was processed  
603 and mapped using CLC Genomics Workbench 10 (Liu and Di 2020) based on reference  
604 genome of *S. lycopersicum* (ITAG 3.0; The Tomato Genome Consortium 2012). Parameters  
605 considered for filtration were adapter trimming, removing the low-quality reads ( $Q < 25$ ),  
606 removal of bases of the start of a read and the end of a read ( $Score < 25$ ). Reads were mapped  
607 to the ITAG 3.0 reference genome using Large Gap Read Mapping tool of Transcript Discovery  
608 Plugins of CLC Genomics Workbench 10. Annotated reference sequences predicted by CLC  
609 bio Transcript Discovery Tool were extracted and used as reference in a subsequent RNA-Seq  
610 analysis. Finally, TPM value was also calculated.

611 The relationships among transcriptome samples were evaluated using the TPM values.  
612 The correlation coefficient between two samples was calculated to evaluate repeatability  
613 between samples using Pearson's test. Principal component analysis (PCA) was performed  
614 using the *plotPCA()* function in DESeq2 R package (Love et al. 2014).

### 615 **Identification of differentially expressed genes and gene co-expression analysis**

616 Differential expression analysis of groups among the different conditions and tissues was  
617 performed using the DESeq2 R package. The raw read counts were inputted to detect  
618 Differential Expressed Genes (DEGs). The  $P$ -value  $\leq 0.001$ , the absolute value of  
619  $\log_2\text{FoldChange} \geq 1$  and a false discovery rate (FDR) adjusted  $P \leq 0.001$  were classified as  
620 differentially expressed genes.



621 To identify the gene co-expression networks, weighted gene correlation network analysis  
622 (WGCNA) was constructed using TPM values to identify specific modules of co-expressed  
623 genes associated with drought stress (Langfelder and Horvath 2008). We first checked for  
624 genes and samples with too many missing values using *goodSamplesGenes()* function in  
625 WGCNA R package. We then removed the offending genes (the last statement returns  
626 'FALSE'). To construct an approximate scale-free network, a soft thresholding power of five  
627 was used to calculate adjacency matrix for a signed co-expression network. Topological  
628 overlap matrix (TOM) and dynamic-cut tree algorithm were used to extract network modules.  
629 We used a minimum module size of 30 genes for the initial network construction and merged  
630 similar modules exhibiting > 75% similarity. To discover modules of significantly drought-related,  
631 module eigengenes were used to calculate correlation with samples with different conditions.  
632 The visualization of networks were created using Cytoscape v3.8.2 (Su et al. 2014).

### 633 **Identification of transcript factor families and transcript factor binding sites**

634 The protein sequences were obtained from the reference genome and annotation 'gff' file with  
635 GffRead (Pertea and Pertea 2020), and were used to identify TF families using online tool  
636 PlantTFDB v5.0 (Guo et al. 2007). Furthermore, the upstream 2000 bp sequences of the  
637 transcription start sites (TSS) were extracted as the gene promoter from the reference genome  
638 to detect TFBS. The TFBS dataset of relative species *S. pennellii* was also downloaded from  
639 Plant Transcriptional Regulatory Map (PlantRegMap, <http://plantregmap.gao-lab.org/>) as  
640 background of TFBS identification (Tian et al. 2020). Then, the TFBS of *S. chilense* was  
641 identified using FIMO program in motif-based sequence analysis tools MEME Suit v5.3.2  
642 (Bailey et al. 2015). The TFBS was extracted with  $p < 1e-5$  and  $q < 0.01$ .

### 643 **Gene ontology (GO) analysis**

644 We first constructed the dataset of assigned GO terms for all genes used protein sequence by  
645 PANTHER v16.0 (Mi et al. 2021). Then, the GO enrichment analysis of drought-responsive  
646 genes was performed using clusterProfiler v3.14.2 (Yu et al. 2012). Benjamini–Hochberg

647 method was used to calibrate  $P$  value, and the significant GO terms were selected with  $P$ -value  
648 below to 0.05.

#### 649 **Construction of phylostratigraphic map**

650 We performed phylostratigraphic analysis based on the following steps. First, the phylostrata  
651 (PS) was defined according to the full linkage of *S. chilense* from NCBI taxonomy database.  
652 The similar PS was merged and finally 18 PS were generated (Figure 4A). Second, the protein  
653 sequences were blast to a database of non-redundant (nr) proteins downloaded from NCBI  
654 (<https://ftp.ncbi.nlm.nih.gov/blast/db/>) with a minimum length of 30 amino acids and an E-value  
655 below  $10^{-6}$  using blastp v2.9.0 (Camacho et al. 2009). Third, each gene was assigned to its PS  
656 by the following criterion: if no blast hit or only one hit of *S. chilense* with an E-value below  $10^{-6}$   
657 was identified, we assigned the gene to the youngest PS18. When multiple blast hits were  
658 identified, we computed lowest common ancestor (LCA) for multiple hits using TaxonKit v0.8.0  
659 (Shen and Ren 2021) and then assigned LCA to specific PS.

#### 660 **Construction of divergence map**

661 We performed divergence stratigraphy analysis to construct sequence divergence map of *S.*  
662 *chilense* using function *divergence\_stratigraphy()* of R package 'orthogr' (Drost et al. 2015)  
663 following four steps: 1) the coding sequences for each gene of *S. chilense* and *S. pennellii*  
664 (NCBI assembly SPENNV200) were extracted from their reference and annotation files. 2) We  
665 identified orthologous gene pairs of both species by choosing the best blast hit for each gene  
666 using blastp. We only considered a gene pair orthologous when the best hit has an E-value  
667 below  $10^{-6}$ , the gene pair is considered orthologous; otherwise, it is discarded. 3) Codon  
668 alignments of the orthologous gene pairs were performed using PAL2NAL (Suyama et al.  
669 2006). Then, Ka/Ks values of the codon alignments were calculated using Comeron's method  
670 (Comeron 1995). And 4) all genes were sorted according to Ka/Ks values into discrete deciles,  
671 which are called divergence stratum (DS).

## 672 **Estimation of transcriptome age index and transcriptome divergence index**

673 The TAI is computed based on phylostratigraphy and expression profile, which assign each  
674 gene to different phylogenetic ages by identification of homologous sequences in other species  
675 (Domazet-Lošo et al. 2007). The evolutionary age of each gene was quantified combining its  
676 PS and expression level to obtain weighted evolutionary age. Finally, weighted ages of all  
677 genes are averaged to yield TAI, which is defined as the mean evolutionary age of a  
678 transcriptome (Domazet-Lošo and Tautz 2010). A lower value of TAI describes an older mean  
679 evolutionary age, whereas a higher value of TAI denotes a younger mean evolutionary age  
680 and implies that evolutionary younger genes are preferentially expressed in the corresponding  
681 sample or condition (Domazet-Lošo and Tautz 2010; Piasecka et al. 2013). The TDI represents  
682 the mean sequence divergence of a transcriptome quantified by divergence strata (DS) and  
683 gene expression profile (Quint et al. 2012). The genes are assigned to different DS and then  
684 weighted by their expression level to yield the TDI. A lower value of TDI describes a more  
685 conserved transcriptome (in terms of sequence dissimilarity), whereas a higher value of TDI  
686 denotes a more variable transcriptome. Here, we calculate TAI and TDI profiles in different  
687 samples using *PlotSignature()* function of the myTAI R package.

## 688 **Population genetics analysis and detection of positive selection on drought-responsive** 689 **genes**

690 Whole-genome sequence data from six populations *S. chilense* (five individuals each)  
691 previously analyzed in (Wei et al. 2022; BioProject PRJEB47577) were used to calculate  
692 population genetics statistics for coding and promoter region sequences for all genes identified  
693 in the GCNs. Single nucleotide variants (SNPs) based on the short-read alignment to the new  
694 reference genome for *S. chilense* (Silva-Arias et al. submitted) using the same methods in Wei  
695 et al. (2022). Population genetics statistics namely, nucleotide diversity ( $\pi$ ) and Tajima's D  
696 were calculated with ANGSD v0.937 (Korneliussen et al. 2014) over gene and promoter  
697 regions. These statistics first were calculated at per site in gene and promoter regions, and

698 then we used a R script ([https://gitlab.lrz.de/population\\_genetics/s.chilense-drought-](https://gitlab.lrz.de/population_genetics/s.chilense-drought-)  
699 transcriptome) to obtain statistics in each gene and promoter regions. PCA on SNP data from  
700 30 whole genomes was also performed using GCTA (v1.91.4; Yang et al. 2011). The genetic  
701 structure inference was performed using ADMIXTURE v1.3.0 (Alexander et al. 2009).

702 Drought-responsive genes under positive selection were extracted by blast (e-value <  
703 1e-6) between drought-responsive genes identified in this study and the genes located inside  
704 sweep regions in our previous study using *S. pennellii* as the reference genome. We also use  
705 the sweep ages obtained in Wei et al. (2022).

## 706 **Estimation of allele age**

707 We implemented in GEVA (Genealogical Estimation of Variant Age; Albers and McVean 2020)  
708 to dating genomic variants in the drought-responsive genes. We generated input for GEVA  
709 based on the recombination rate  $3.24 \times 10^{-9}$  per site per generation (based on the overall  
710 recombination density in *S. lycopersicum* [1.41 cM/Mb] Anderson and Stack 2002; Nieri et al.  
711 2017; and within the possible range of rates in Wei et al. 2022). We used population size ( $N_e$ )  
712 20,000 and mutation rate  $5.1 \times 10^{-9}$  (Roselius et al. 2005; Wei et al. 2022), and then relied on  
713 the recombination clock to estimate the age of alleles (tMRCA).

714

## 715 **Supplementary material**

716 Supplementary data are available online.

717

## 718 **Acknowledgements**

719 KW was funded by the Chinese Scholarship Council. SS was funded by the Fulbright Visiting  
720 Scholar Program of the U.S. Department of State and by German Academic Exchange Service

721 (DAAD) within the framework of Research Stays for University Academics and Scientists.  
722 GAS-A was funded by the Technical University of Munich. AT acknowledges funding from DFG  
723 (Deutscher Forschungsgemeinschaft) Grant Number: 317616126 (TE809/7-1). NS  
724 acknowledges funding from U.S. National Science Foundation (NSF/ IOS-1238243). This work  
725 was supported by grants from JSPS KAKENHI (JP19K23742, JP20K06682, JP20KK0340 to  
726 H.N.), and NSF PGRP IOS-1856749 and IOS-211980 to NS. The laboratory work of H.N. was  
727 supported by a Grant-in-Aid for Scientific Research on Innovative Areas (JP19H05672). We  
728 thank the Tomato Genetics Resource Center (TGRC) of the University of California, Davis for  
729 generously providing us with the seeds of the accession included in this study.

730

### 731 **Data Availability**

732 The raw single-end sequencing RNA data is available in PRJDB15063. The raw pair-end  
733 sequencing genomic data can be accessed at the European Nucleotide Archive (ENA) project  
734 accession PRJEB47577. All codes used in this study and other previously published genomic  
735 data are available at the sources referenced. The code for implementing the analyses used in  
736 this paper can be found on our GitLab repository:  
737 [https://gitlab.lrz.de/population\\_genetics/s.chilense-drought-transcriptome](https://gitlab.lrz.de/population_genetics/s.chilense-drought-transcriptome)

738 **References**

- 739 Albers PK, McVean G. 2020. Dating genomic variants and shared ancestry in population-  
740 scale sequencing data. *PLOS Biol.* 18:e3000586.
- 741 Alexander DH, Novembre J, Lange K. 2009. Fast model-based estimation of ancestry in  
742 unrelated individuals. *Genome Res.* 19:1655–1664.
- 743 Alves AA, Setter TL. 2004. Response of cassava leaf area expansion to water deficit: cell  
744 proliferation, cell expansion and delayed development. *Ann. Bot.* 94:605–613.
- 745 Anderson L, Stack S. 2002. Meiotic recombination in plants. *Curr. Genomics* 3:507–525.
- 746 Bailey TL, Johnson J, Grant CE, Noble WS. 2015. The MEME suite. *Nucleic Acids Res.*  
747 43:W39–W49.
- 748 Basu S, Ramegowda V, Kumar A, Pereira A. 2016. Plant adaptation to drought stress.  
749 *F1000Research* 5.
- 750 Bolger A, Scossa F, Bolger ME, Lanz C, Maumus F, Tohge T, Quesneville H, Alseekh S,  
751 Sørensen I, Lichtenstein G, et al. 2014. The genome of the stress-tolerant wild tomato  
752 species *Solanum pennellii*. *Nat. Genet.* 46:1034–1038.
- 753 Böndel KB, Lainer H, Nosenko T, Mboup M, Tellier A, Stephan W. 2015. North–south  
754 colonization associated with local adaptation of the wild tomato species *Solanum chilense*.  
755 *Mol. Biol. Evol.* 32:2932–2943.
- 756 Böndel KB, Nosenko T, Stephan W. 2018. Signatures of natural selection in abiotic stress-  
757 responsive genes of *Solanum chilense*. *R. Soc. Open Sci.* 5:171198.
- 758 Bowles AMC, Paps J, Bechtold U. 2021. Evolutionary origins of drought tolerance in  
759 Spermatophytes. *Front. Plant Sci.* 12.
- 760 Bushnell B. 2014. BBTools. A suite of bioinformatics tools used for DNA and RNA sequence  
761 data analysis. *DOE Jt. Genome Inst.* [Internet]. Available from:  
762 <https://sourceforge.net/projects/bbmap/>
- 763 Camacho C, Coulouris G, Avagyan V, Ma N, Papadopoulos J, Bealer K, Madden TL. 2009.  
764 BLAST+: architecture and applications. *BMC Bioinformatics* 10:1–9.
- 765 Chen WJ, Zhu T. 2004. Networks of transcription factors with roles in environmental stress  
766 response. *Trends Plant Sci.* 9:591–596.
- 767 Ciais P, Reichstein M, Viovy N, Granier A, Ogée J, Allard V, Aubinet M, Buchmann N,  
768 Bernhofer C, Carrara A, et al. 2005. Europe-wide reduction in primary productivity caused by  
769 the heat and drought in 2003. *Nature* 437:529–533.
- 770 Clark JW, Donoghue PCJ. 2018. Whole-genome duplication and plant macroevolution.  
771 *Trends Plant Sci.* 23:933–945.
- 772 Clark JW, Harris BJ, Hetherington AJ, Hurtado-Castaño N, Brench RA, Casson S, Williams  
773 TA, Gray JE, Hetherington AM. 2022. The origin and evolution of stomata. *Curr. Biol.*  
774 32:R539–R553.

- 775 Crow M, Suresh H, Lee J, Gillis J. 2022. Coexpression reveals conserved gene programs  
776 that co-vary with cell type across kingdoms. *Nucleic Acids Res.* 50:4302–4314.
- 777 Danilevskaya ON, Yu G, Meng X, Xu J, Stephenson E, Estrada S, Chilakamarri S, Zastrow-  
778 Hayes G, Thatcher S. 2019. Developmental and transcriptional responses of maize to  
779 drought stress under field conditions. *Plant Direct* 3:e00129.
- 780 Deshpande JN, Fronhofer EA. 2022. Genetic architecture of dispersal and local adaptation  
781 drives accelerating range expansions. *Proc. Natl. Acad. Sci.* 119:e2121858119.
- 782 Domazet-Lošo T, Brajković J, Tautz D. 2007. A phylostratigraphy approach to uncover the  
783 genomic history of major adaptations in metazoan lineages. *Trends Genet.* 23:533–539.
- 784 Domazet-Lošo T, Tautz D. 2010. A phylogenetically based transcriptome age index mirrors  
785 ontogenetic divergence patterns. *Nature* 468:815–818.
- 786 Drost H-G, Bellstädt J, Ó'Maoiléidigh DS, Silva AT, Gabel A, Weinholdt C, Ryan PT, Dekkers  
787 BJW, Bentsink L, Hilhorst HWM, et al. 2016. Post-embryonic hourglass patterns mark  
788 ontogenetic transitions in plant development. *Mol. Biol. Evol.* 33:1158–1163.
- 789 Drost H-G, Gabel A, Grosse I, Quint M. 2015. Evidence for active maintenance of  
790 phylotranscriptomic hourglass patterns in animal and plant embryogenesis. *Mol. Biol. Evol.*  
791 32:1221–1231.
- 792 Dubois M, Inzé D. 2020. Plant growth under suboptimal water conditions: early responses  
793 and methods to study them. Mittler R, editor. *J. Exp. Bot.* 71:1706–1722.
- 794 Erwin DH. 2020. Chapter Thirteen - Evolutionary dynamics of gene regulation. In: Peter IS,  
795 editor. *Current Topics in Developmental Biology*. Vol. 139. Gene Regulatory Networks.  
796 Academic Press. p. 407–431. Available from:  
797 <https://www.sciencedirect.com/science/article/pii/S0070215320300326>
- 798 Erwin DH, Davidson EH. 2009. The evolution of hierarchical gene regulatory networks. *Nat.*  
799 *Rev. Genet.* 10:141–148.
- 800 Fàbregas N, Fernie AR. 2019. The metabolic response to drought. *J. Exp. Bot.* 70:1077–  
801 1085.
- 802 Farooq M, Wahid A, Kobayashi N, Fujita D, Basra S. 2009. Plant drought stress: effects,  
803 mechanisms and management. *Sustain. Agric.*:153–188.
- 804 Ficklin SP, Feltus FA. 2011. Gene coexpression network alignment and conservation of gene  
805 modules between two grass species: maize and rice. *Plant Physiol.* 156:1244–1256.
- 806 Fischer I, Camus-Kulandaivelu L, Allal F, Stephan W. 2011. Adaptation to drought in two wild  
807 tomato species: the evolution of the *Asr* gene family. *New Phytol.* 190:1032–1044.
- 808 Fischer I, Steige KA, Stephan W, Mboup M. 2013. Sequence evolution and expression  
809 regulation of stress-responsive genes in natural populations of wild tomato. *PLoS One*  
810 8:e78182–e78182.
- 811 Flowers JM, Sezgin E, Kumagai S, Duvernell DD, Matzkin LM, Schmidt PS, Eanes WF.  
812 2007. Adaptive evolution of metabolic pathways in *Drosophila*. *Mol. Biol. Evol.* 24:1347–  
813 1354.



- 814 Gehan MA, Greenham K, Mockler TC, McClung CR. 2015. Transcriptional networks—crops,  
815 clocks, and abiotic stress. *Curr. Opin. Plant Biol.* 24:39–46.
- 816 Gerstein MB, Rozowsky J, Yan K-K, Wang D, Cheng C, Brown JB, Davis CA, Hillier L, Sisu  
817 C, Li JJ. 2014. Comparative analysis of the transcriptome across distant species. *Nature*  
818 512:445–448.
- 819 Guo A-Y, Chen X, Gao G, Zhang H, Zhu Q-H, Liu X-C, Zhong Y-F, Gu X, He K, Luo J. 2007.  
820 PlantTFDB: a comprehensive plant transcription factor database. *Nucleic Acids Res.*  
821 36:D966–D969.
- 822 Gupta A, Rico-Medina A, Caño-Delgado AI. 2020. The physiology of plant responses to  
823 drought. *Science* 368:266–269.
- 824 Haak DC, Kostyun JL, Moyle LC. 2014. Merging ecology and genomics to dissect diversity in  
825 wild tomatoes and their relatives. In: Landry CR, Aubin-Horth N, editors. *Ecological*  
826 *Genomics*. Vol. 781. Dordrecht: Springer Netherlands. p. 273–298. Available from:  
827 [http://link.springer.com/10.1007/978-94-007-7347-9\\_14](http://link.springer.com/10.1007/978-94-007-7347-9_14)
- 828 Hämälä T, Gorton AJ, Moeller DA, Tiffin P. 2020. Pleiotropy facilitates local adaptation to  
829 distant optima in common ragweed (*Ambrosia artemisiifolia*). *PLoS Genet.* 16:e1008707.
- 830 Harb A, Krishnan A, Ambavaram MMR, Pereira A. 2010. Molecular and physiological analysis  
831 of drought stress in *Arabidopsis* reveals early responses leading to acclimation in plant  
832 growth. *Plant Physiol.* 154:1254–1271.
- 833 Harrison PW, Wright AE, Mank JE. 2012. The evolution of gene expression and the  
834 transcriptome–phenotype relationship. *Semin. Cell Dev. Biol.* 23:222–229.
- 835 Jill Harrison C. 2017. Development and genetics in the evolution of land plant body plans.  
836 *Philos. Trans. R. Soc. B Biol. Sci.* 372:20150490.
- 837 Josephs EB, Wright SI, Stinchcombe JR, Schoen DJ. 2017. The relationship between  
838 selection, network connectivity, and regulatory variation within a population of *Capsella*  
839 *grandiflora*. *Genome Biol. Evol.* 9:1099–1109.
- 840 Jovelin R, Phillips PC. 2009. Evolutionary rates and centrality in the yeast gene regulatory  
841 network. *Genome Biol.* 10:1–10.
- 842 Juenger TE. 2013. Natural variation and genetic constraints on drought tolerance. *Curr. Opin.*  
843 *Plant Biol.* 16:274–281.
- 844 Kashyap SP, Prasanna HC, Kumari N, Mishra P, Singh B. 2020. Understanding salt tolerance  
845 mechanism using transcriptome profiling and *de novo* assembly of wild tomato *Solanum*  
846 *chilense*. *Sci. Rep.* 10:1–20.
- 847 Kim PM, Korbel JO, Gerstein MB. 2007. Positive selection at the protein network periphery:  
848 evaluation in terms of structural constraints and cellular context. *Proc. Natl. Acad. Sci.*  
849 104:20274–20279.
- 850 Koenig D, Jiménez-Gómez JM, Kimura S, Fulop D, Chitwood DH, Headland LR, Kumar R,  
851 Covington MF, Devisetty UK, Tat AV, et al. 2013. Comparative transcriptomics reveals  
852 patterns of selection in domesticated and wild tomato. *Proc. Natl. Acad. Sci.* 110:E2655–  
853 E2662.



- 854 Korneliussen TS, Albrechtsen A, Nielsen R. 2014. ANGSD: Analysis of Next Generation  
855 Sequencing Data. *BMC Bioinformatics* 15:356.
- 856 Koubkova-Yu TC-T, Chao J-C, Leu J-Y. 2018. Heterologous Hsp90 promotes phenotypic  
857 diversity through network evolution. *PLoS Biol.* 16:e2006450.
- 858 Kumar R, Ichihashi Y, Kimura S, Chitwood DH, Headland LR, Peng J, Maloof JN, Sinha NR.  
859 2012. A high-throughput method for Illumina RNA-Seq library preparation. *Front. Plant Sci.*  
860 3:202.
- 861 Langfelder P, Horvath S. 2008. WGCNA: an R package for weighted correlation network  
862 analysis. *BMC Bioinformatics* 9:559.
- 863 Liao Y, Smyth GK, Shi W. 2014. featureCounts: an efficient general purpose program for  
864 assigning sequence reads to genomic features. *Bioinformatics* 30:923–930.
- 865 Liu C-H, Di YP. 2020. Analysis of RNA sequencing data using CLC genomics workbench. In:  
866 Molecular Toxicology Protocols. Springer. p. 61–113.
- 867 Love MI, Huber W, Anders S. 2014. Moderated estimation of fold change and dispersion for  
868 RNA-seq data with DESeq2. *Genome Biol.* 15:550.
- 869 Luisi P, Alvarez-Ponce D, Pybus M, Fares MA, Bertranpetit J, Laayouni H. 2015. Recent  
870 positive selection has acted on genes encoding proteins with more interactions within the  
871 whole human interactome. *Genome Biol. Evol.* 7:1141–1154.
- 872 Mähler N, Wang J, Terebieniec BK, Ingvarsson PK, Street NR, Hvidsten TR. 2017. Gene co-  
873 expression network connectivity is an important determinant of selective constraint. *PLoS*  
874 *Genet.* 13:e1006402.
- 875 Martínez JP, Antúnez A, Araya H, Pertuzé R, Fuentes L, Lizana XC, Lutts S. 2014. Salt stress  
876 differently affects growth, water status and antioxidant enzyme activities in *Solanum*  
877 *lycopersicum* and its wild relative *Solanum chilense*. *Aust. J. Bot.* 62:359–368.
- 878 Masalia RR, Bewick AJ, Burke JM. 2017. Connectivity in gene coexpression networks  
879 negatively correlates with rates of molecular evolution in flowering plants. *PLoS One*  
880 12:e0182289.
- 881 Mboup M, Fischer I, Lainer H, Stephan W. 2012. Trans-species polymorphism and allele-  
882 specific expression in the *CBF* gene family of wild tomatoes. *Mol. Biol. Evol.* 29:3641–3652.
- 883 Mes PJ, Boches P, Myers JR, Durst R. 2008. Characterization of tomatoes expressing  
884 anthocyanin in the fruit. *J. Am. Soc. Hortic. Sci.* 133:262–269.
- 885 Mi H, Ebert D, Muruganujan A, Mills C, Albou L-P, Mushayamaha T, Thomas PD. 2021.  
886 PANTHER version 16: a revised family classification, tree-based classification tool, enhancer  
887 regions and extensive API. *Nucleic Acids Res.* 49:D394–D403.
- 888 Molitor C, Kurowski TJ, Fidalgo de Almeida PM, Eerolla P, Spindlow DJ, Kashyap SP, Singh  
889 B, Prasanna HC, Thompson AJ, Mohareb FR. 2021. *De novo* genome assembly of *Solanum*  
890 *sitiens* reveals structural variation associated with drought and salinity tolerance. Valencia A,  
891 editor. *Bioinformatics* 37:1941–1945.
- 892 Mustafin ZS, Zamyatin VI, Konstantinov DK, Doroshkov AV, Lashin SA, Afonnikov DA. 2019.  
893 Phylostratigraphic analysis shows the earliest origination of the abiotic stress associated  
894 genes in *A. thaliana*. *Genes* 10:963.

- 895 Nakazato T, Warren DL, Moyle LC. 2010. Ecological and geographic modes of species  
896 divergence in wild tomatoes. *Am. J. Bot.* 97:680–693.
- 897 Nieri D, Di Donato A, Ercolano MR. 2017. Analysis of tomato meiotic recombination profile  
898 reveals preferential chromosome positions for NB-LRR genes. *Euphytica* 213:206.
- 899 Nosenko T, Böndel KB, Kumpfmüller G, Stephan W. 2016. Adaptation to low temperatures in  
900 the wild tomato species *Solanum chilense*. *Mol. Ecol.* 25:2853–2869.
- 901 Papakostas S, Vøllestad LA, Bruneaux M, Aykanat T, Vanoverbeke J, Ning M, Primmer CR,  
902 Leder EH. 2014. Gene pleiotropy constrains gene expression changes in fish adapted to  
903 different thermal conditions. *Nat. Commun.* 5:1–9.
- 904 Pertea G, Pertea M. 2020. GFF Utilities: GffRead and GffCompare. Available from:  
905 <https://f1000research.com/articles/9-304>
- 906 Piasecka B, Lichocki P, Moretti S, Bergmann S, Robinson-Rechavi M. 2013. The hourglass  
907 and the early conservation models—co-existing patterns of developmental constraints in  
908 vertebrates. *PLoS Genet.* 9:e1003476.
- 909 Quint M, Drost H-G, Gabel A, Ullrich KK, Bönn M, Grosse I. 2012. A transcriptomic hourglass  
910 in plant embryogenesis. *Nature* 490:98–101.
- 911 Raduski AR, Igić B. 2021. Biosystematic studies on the status of *Solanum chilense*. *Am. J.*  
912 *Bot.* 108:520–537.
- 913 Reddy AR, Chaitanya KV, Vivekanandan M. 2004. Drought-induced responses of  
914 photosynthesis and antioxidant metabolism in higher plants. *J. Plant Physiol.* 161:1189–  
915 1202.
- 916 Rodrigues J, Inzé D, Nelissen H, Saibo NJ. 2019. Source–sink regulation in crops under  
917 water deficit. *Trends Plant Sci.* 24:652–663.
- 918 Roselius K, Stephan W, Städler T. 2005. The relationship of nucleotide polymorphism,  
919 recombination rate and selection in wild Tomato species. *Genetics* 171:753–763.
- 920 Sato MP, Makino T, Kawata M. 2016. Natural selection in a population of *Drosophila*  
921 *melanogaster* explained by changes in gene expression caused by sequence variation in  
922 core promoter regions. *BMC Evol. Biol.* 16:1–12.
- 923 Shen W, Ren H. 2021. TaxonKit: A practical and efficient NCBI taxonomy toolkit. *J. Genet.*  
924 *Genomics.*
- 925 Skiryecz A, Inzé D. 2010. More from less: plant growth under limited water. *Curr. Opin.*  
926 *Biotechnol.* 21:197–203.
- 927 Spivakov M. 2014. Spurious transcription factor binding: non-functional or genetically  
928 redundant? *Bioessays* 36:798–806.
- 929 Stam R, Silva-Arias GA, Tellier A. 2019. Subsets of NLR genes show differential signatures  
930 of adaptation during colonization of new habitats. *New Phytol.* 224:367–379.
- 931 Stuart JM, Segal E, Koller D, Kim SK. 2003. A gene-coexpression network for global  
932 discovery of conserved genetic modules. *science* 302:249–255.

- 933 Su G, Morris JH, Demchak B, Bader GD. 2014. Biological network exploration with  
934 Cytoscape 3. *Curr. Protoc. Bioinforma.* 47:8.13.1-8.13.24.
- 935 Swanson-Wagner R, Briskine R, Schaefer R, Hufford MB, Ross-Ibarra J, Myers CL, Tiffin P,  
936 Springer NM. 2012. Reshaping of the maize transcriptome by domestication. *Proc. Natl.*  
937 *Acad. Sci.* 109:11878–11883.
- 938 Tapia G, Castro M, Gaete-Eastman C, Figueroa CR. 2022. Regulation of anthocyanin  
939 biosynthesis by drought and UV-B radiation in wild tomato (*Solanum peruvianum*) fruit.  
940 *Antioxidants* 11:1639.
- 941 Tapia G, Méndez J, Inostroza L. 2016. Different combinations of morpho-physiological traits  
942 are responsible for tolerance to drought in wild tomatoes *Solanum chilense* and *Solanum*  
943 *peruvianum*. *Plant Biol.* 18:406–416.
- 944 The Tomato Genome Consortium. 2012. The tomato genome sequence provides insights  
945 into fleshy fruit evolution. *Nature* 485:635–641.
- 946 Tian F, Yang D-C, Meng Y-Q, Jin J, Gao G. 2020. PlantRegMap: charting functional  
947 regulatory maps in plants. *Nucleic Acids Res.* 48:D1104–D1113.
- 948 Townsley BT, Covington MF, Ichihashi Y, Zumstein K, Sinha NR. 2015. BrAD-seq: Breath  
949 Adapter Directional sequencing: a streamlined, ultra-simple and fast library preparation  
950 protocol for strand specific mRNA library construction. *Front. Plant Sci.* 6.
- 951 True JR, Haag ES. 2001. Developmental system drift and flexibility in evolutionary  
952 trajectories. *Evol. Dev.* 3:109–119.
- 953 Verelst W, Bertolini E, De Bodt S, Vandepoele K, Demeulenaere M, Pè ME, Inzé D. 2013.  
954 Molecular and physiological analysis of growth-limiting drought stress in *Brachypodium*  
955 *distachyon* leaves. *Mol. Plant* 6:311–322.
- 956 de Vries J, Archibald JM. 2018. Plant evolution: landmarks on the path to terrestrial life. *New*  
957 *Phytol.* 217:1428–1434.
- 958 de Vries J, Curtis BA, Gould SB, Archibald JM. 2018. Embryophyte stress signaling evolved  
959 in the algal progenitors of land plants. *Proc. Natl. Acad. Sci.* 115:E3471–E3480.
- 960 Wagner GP, Kin K, Lynch VJ. 2012. Measurement of mRNA abundance using RNA-seq data:  
961 RPKM measure is inconsistent among samples. *Theory Biosci* 131:281–285.
- 962 Wagner GP, Pavlicev M, Cheverud JM. 2007. The road to modularity. *Nat. Rev. Genet.*  
963 8:921–931.
- 964 Wang S, Li L, Li H, Sahu SK, Wang H, Xu Y, Xian W, Song B, Liang H, Cheng S, et al. 2020.  
965 Genomes of early-diverging streptophyte algae shed light on plant terrestrialization. *Nat.*  
966 *Plants* 6:95–106.
- 967 Wang Y, Wang X, Paterson AH. 2012. Genome and gene duplications and gene expression  
968 divergence: a view from plants. *Ann. N. Y. Acad. Sci.* 1256:1–14.
- 969 Wei K, Silva-Arias GA, Tellier A. 2022. Selective sweeps linked to colonization of novel  
970 habitats and climatic changes in a wild tomato species. *New Phytol.*:nph.18634.
- 971 Wilkinson S, Davies WJ. 2010. Drought, ozone, ABA and ethylene: new insights from cell to  
972 plant to community. *Plant Cell Environ.* 33:510–525.

- 973 Wysoker A, Fennell T, Ruan J, Homer N, Marth G, Abecasis G, Durbin R. 2009. The  
974 Sequence alignment/map (SAM) format and SAMtools. *Bioinformatics* 25:2078–2079.
- 975 Yu G, Wang L-G, Han Y, He Q-Y. 2012. clusterProfiler: an R Package for Comparing  
976 Biological Themes Among Gene Clusters. *OMICS J. Integr. Biol.* 16:284–287.
- 977 Zarrineh P, Sánchez-Rodríguez A, Hosseinkhan N, Narimani Z, Marchal K, Masoudi-Nejad A.  
978 2014. Genome-scale co-expression network comparison across *Escherichia coli* and  
979 *Salmonella enterica* serovar *Typhimurium* reveals significant conservation at the regulon  
980 level of local regulators despite their dissimilar lifestyles. *PLoS One* 9:e102871.
- 981 Zinkgraf M, Zhao S-T, Canning C, Gerttula S, Lu M-Z, Filkov V, Groover A. 2020.  
982 Evolutionary network genomics of wood formation in a phylogenetic survey of angiosperm  
983 forest trees. *New Phytol.* 228:1811–1823.

984 **Figure legends**

985

986 **Figure 1.** Exploratory analyses of RNA-seq differential expression patterns in 16 libraries of *Solanum*  
987 *chilense*. (A) PCA reveals stronger clustering associated with the experimental conditions. (B) Heatmap  
988 plot of sample correlation (Pearson's test) reveals exact drought specificity. RNAseq libraries  
989 abbreviations, CL-A to CL-D: leaves in control condition, CSA-E to CSA-H: shoot apex in control  
990 condition, DL-I to DL-L: leave in drought condition, DSA-M to DSA-P: shoot apex in drought condition.  
991 Color scale indicates correlation coefficients from high values in red to low values in white.

992

993 **Figure 2.** Identification of drought-response networks in *Solanum chilense*. (A) Differentially  
994 Expressed Genes (DEGs) identified from three comparison groups from left to right: 8 control versus 8  
995 drought samples, 4 control leaves versus 4 drought leaves, 4 control shoot apices versus 4 drought  
996 shoot apices. Red indicates significantly upregulated genes, and green indicates significantly  
997 downregulated genes between control and drought samples using fold change higher than two ( $P \leq$   
998 0.001). (B) Venn diagram show 2,484 shared DEGs in three comparison groups. (C) The correlation  
999 between samples expression patterns for the eight modules. Color scale indicates correlation  
1000 coefficients from high positive coefficient in red to high negative coefficient in green. No correlation is  
1001 indicated in white.

1002

1003 **Figure 3.** Gene ontology (GO) term enrichment in the cell-cycle and metabolic drought-response  
1004 networks. (A) Top 20 terms of biological process. (B) Top 20 terms of cellular component.

1005

1006 **Figure 4.** Transcriptome age index (TAI) profiles of cell-cycle and metabolic networks. (A)  
1007 Phylostratigraphic map of two networks and phylogeny used in the search for the evolutionary origin of  
1008 *Solanum chilense* genes. Numbers in parentheses denote the number of genes assigned to each  
1009 phylostratum (PS) in cell-cycle and metabolic network, respectively. (B) Gene ratio in each PS for two  
1010 networks. (C) TAI profiles of two networks across samples. (D) TAI contributions split according to  
1011 different PS in cell-cycle network. (E) TAI contributions split according to different PS in metabolic  
1012 network.

1013

1014 **Figure 5.** Transcriptome divergence index (TDI) profiles of cell-cycle and metabolic networks. (A)  
1015 Distribution of Ka/Ks ratio of genes in two networks, respectively. (B) TDI profiles of two networks across  
1016 samples. (C) TDI contributions split according to different DS in cell-cycle network. (D) TDI contributions  
1017 split according to different DS in metabolic network.

1018

1019 **Figure 6.** Drought-responsive genes under positive selection. (A) The candidate genes under positive  
1020 selection were identified in our previous study (Wei et al. 2022). The bar plot shows that number of  
1021 positive selection genes in the cell-cycle and metabolic networks, the pie charts denote positive selection  
1022 genes of two networks in six populations. The size of pie represents number of genes (see also Table  
1023 S6). (B) The connectivity of drought-responsive genes under positive selection in the two networks and

1024 six populations. (C) The correlations between connectivity and age of drought-responsive genes under  
1025 positive selection in the two networks and six populations. (D) The visualization of cell-cycle network.  
1026 (E) The visualization of metabolic network. Red-to-orange colored dots denote candidate genes under  
1027 positive selection identified in Wei *et al.* (2022). The red-to-orange scale denote the ages of selective  
1028 sweeps. The location of the dots closer to the center of the networks indicates that the gene exhibits  
1029 higher connectivity.

A

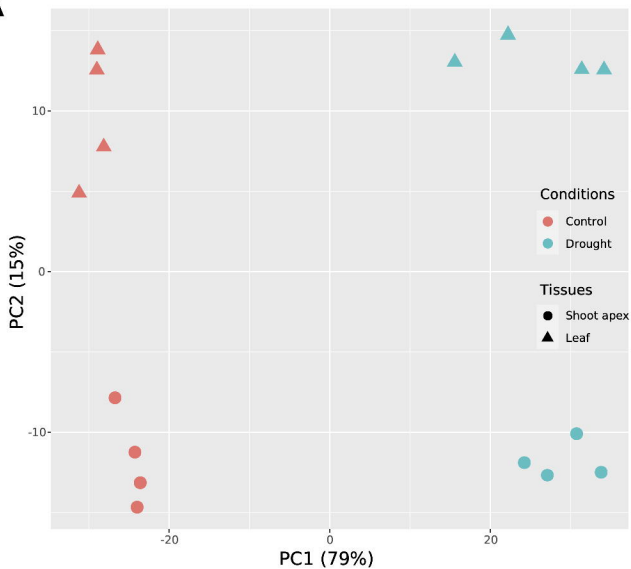

B

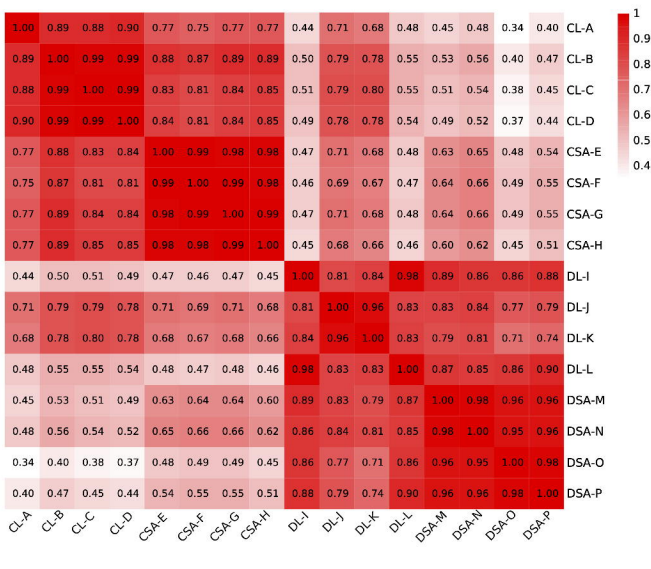







A

## cell-cycle

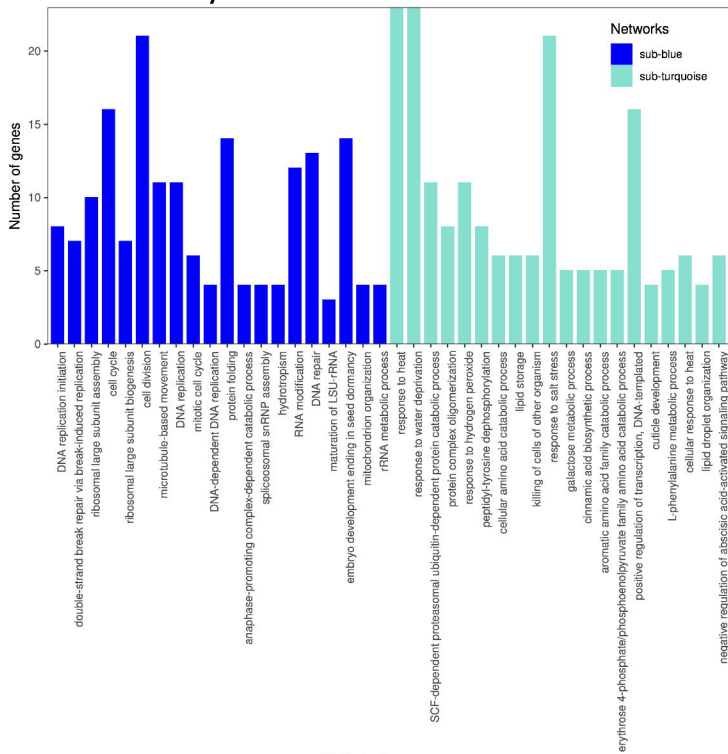

Biological process

B

## cell-cycle

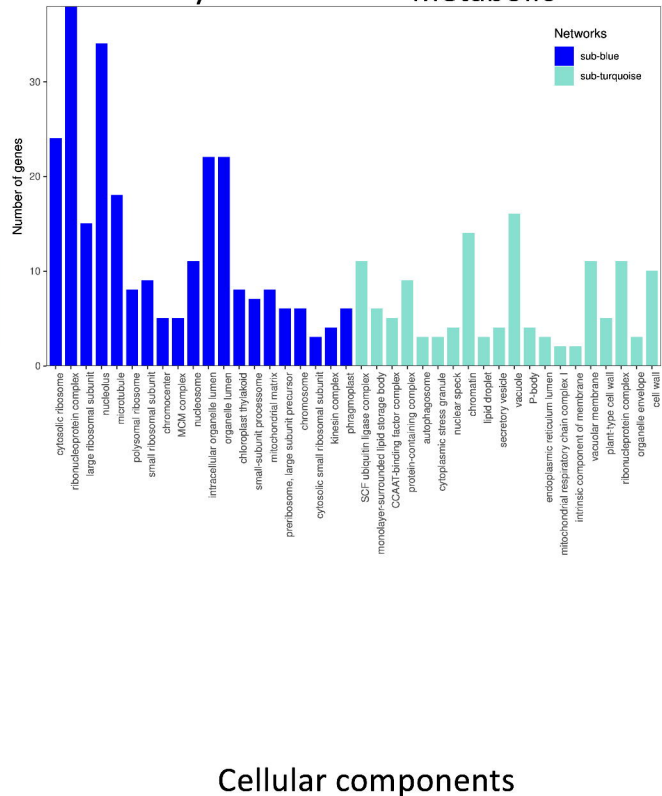

Cellular components

A

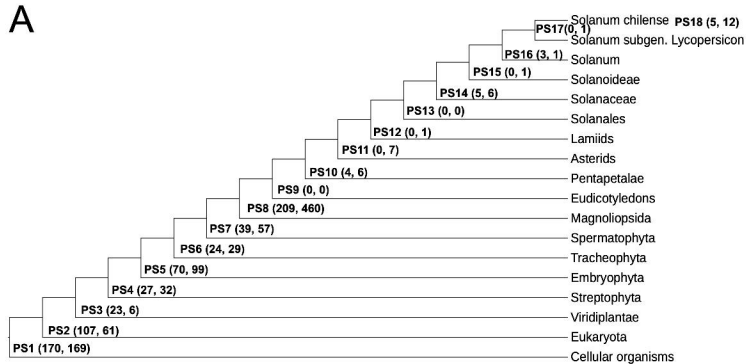

B

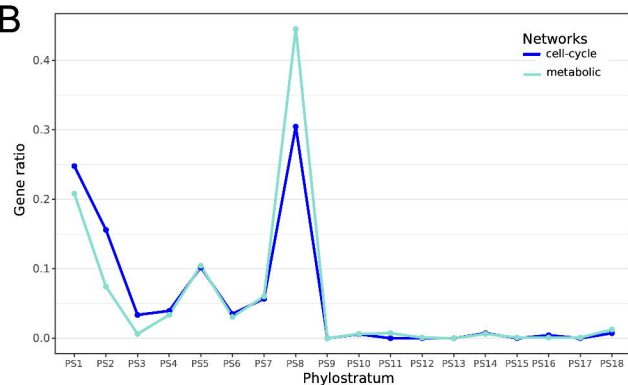

C

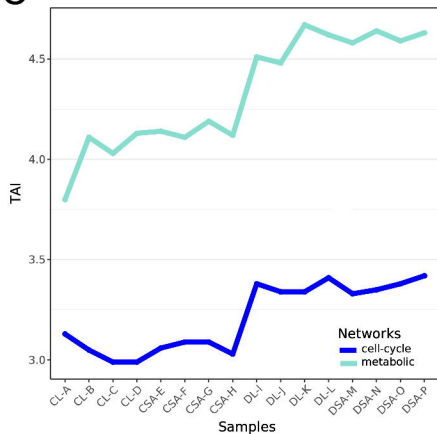

D

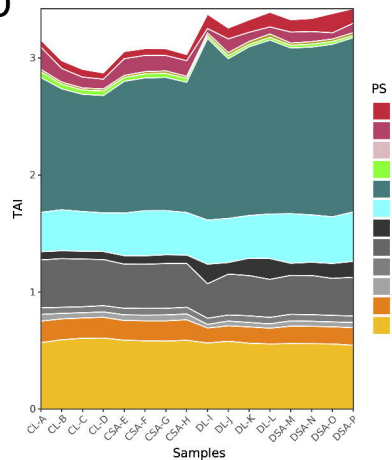

E

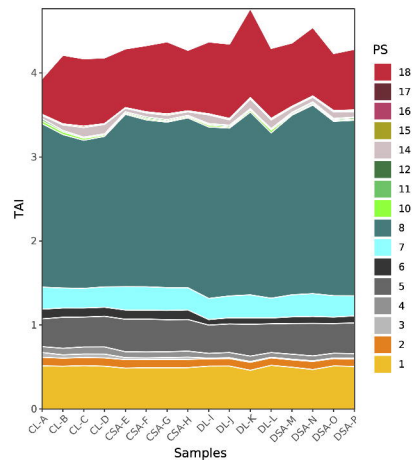

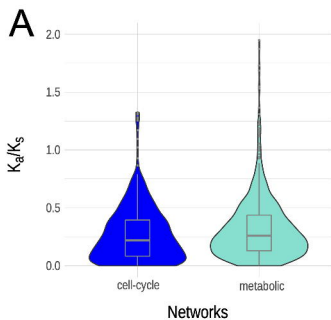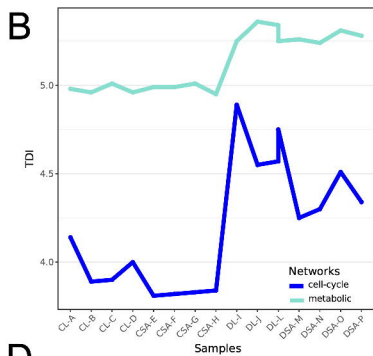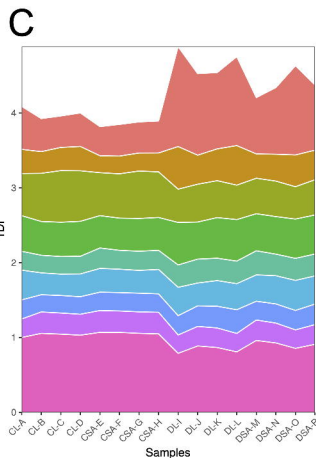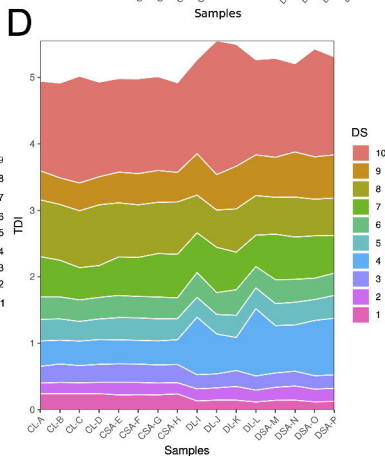

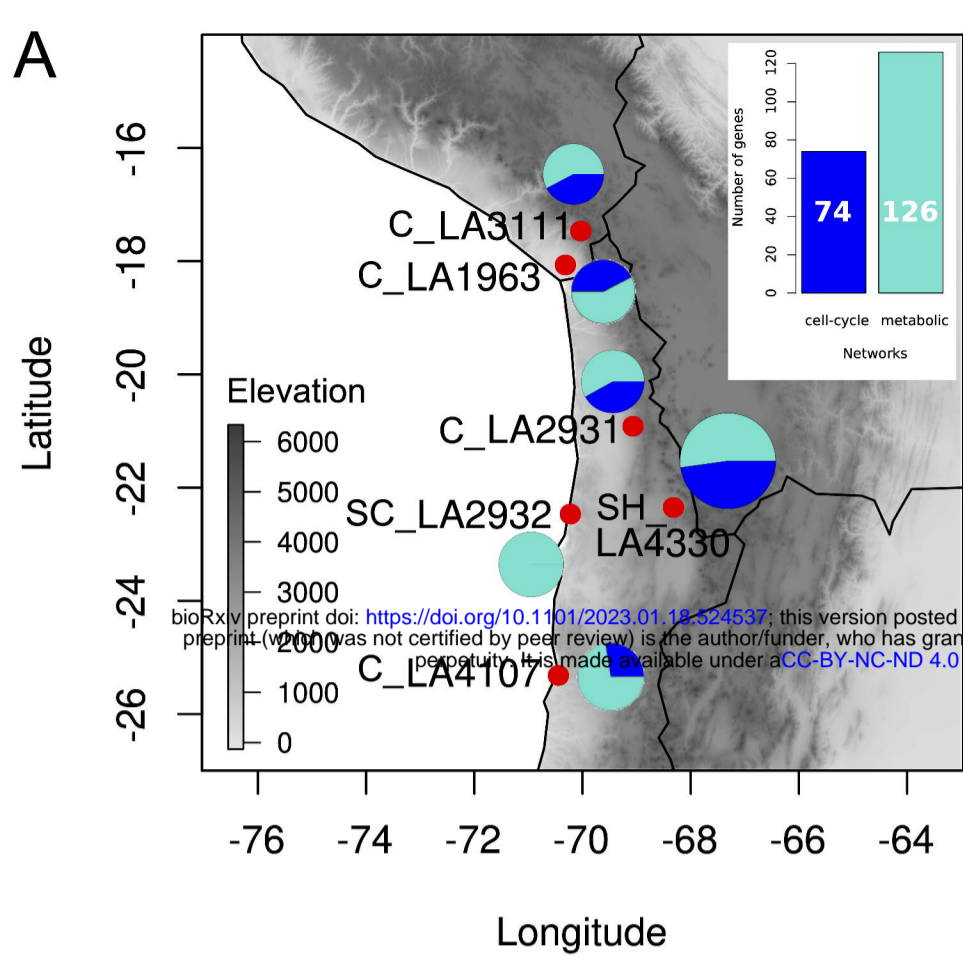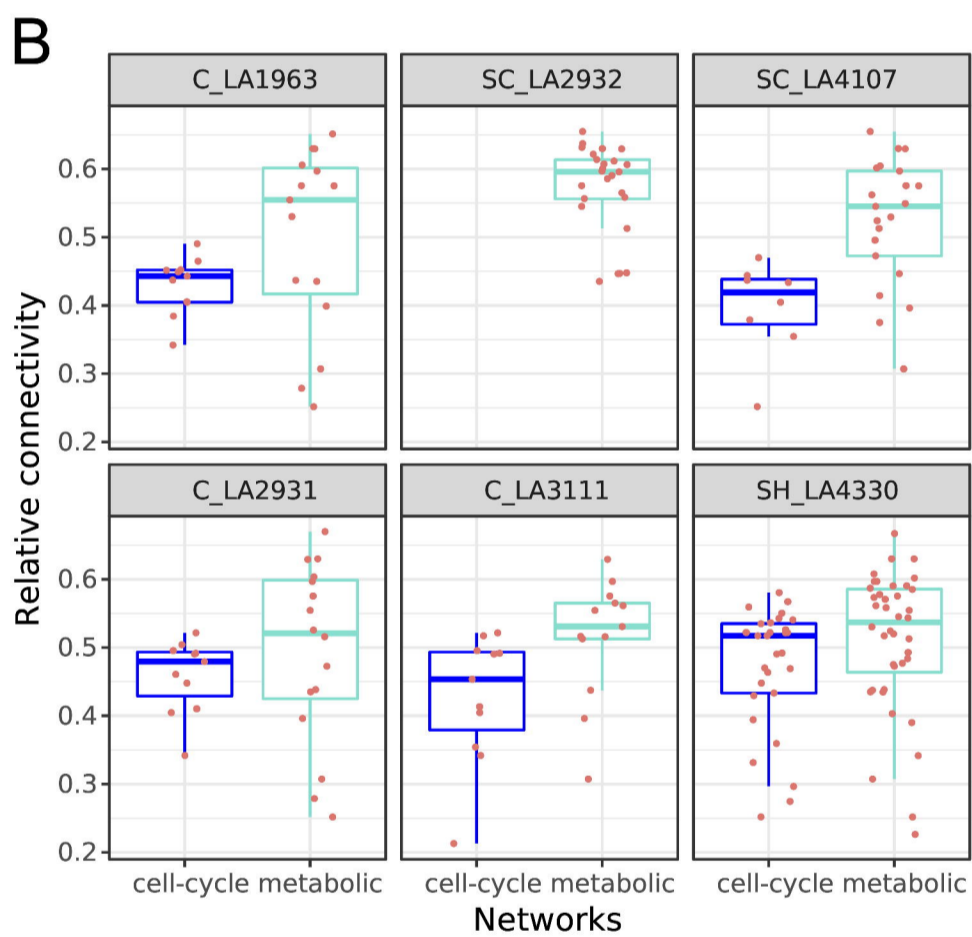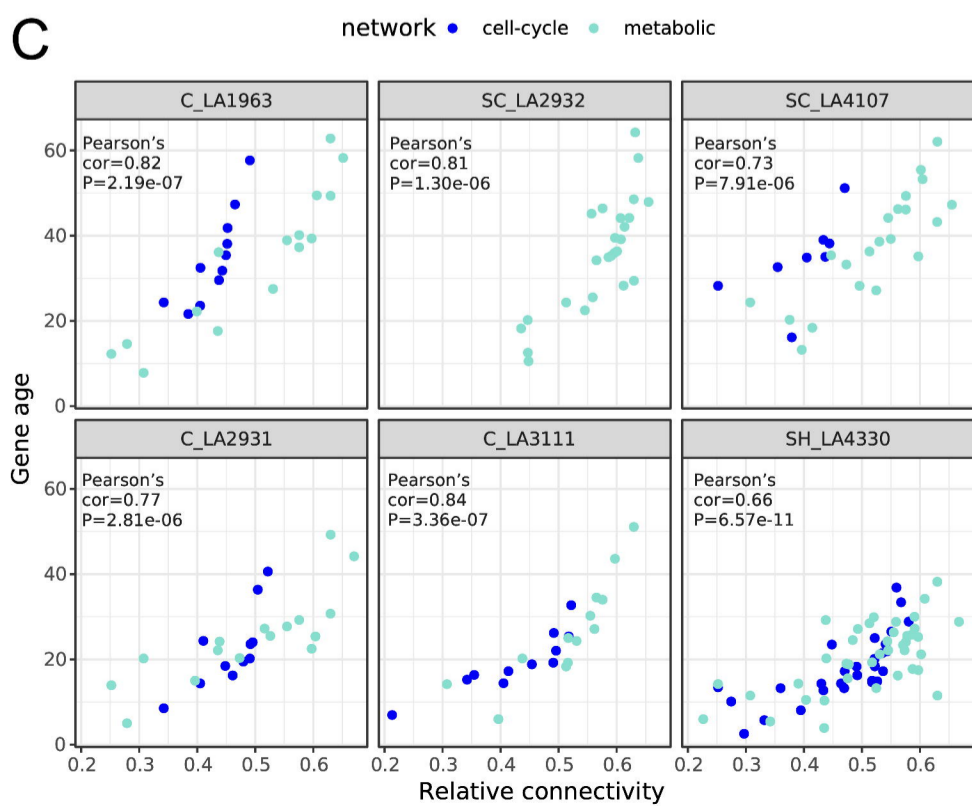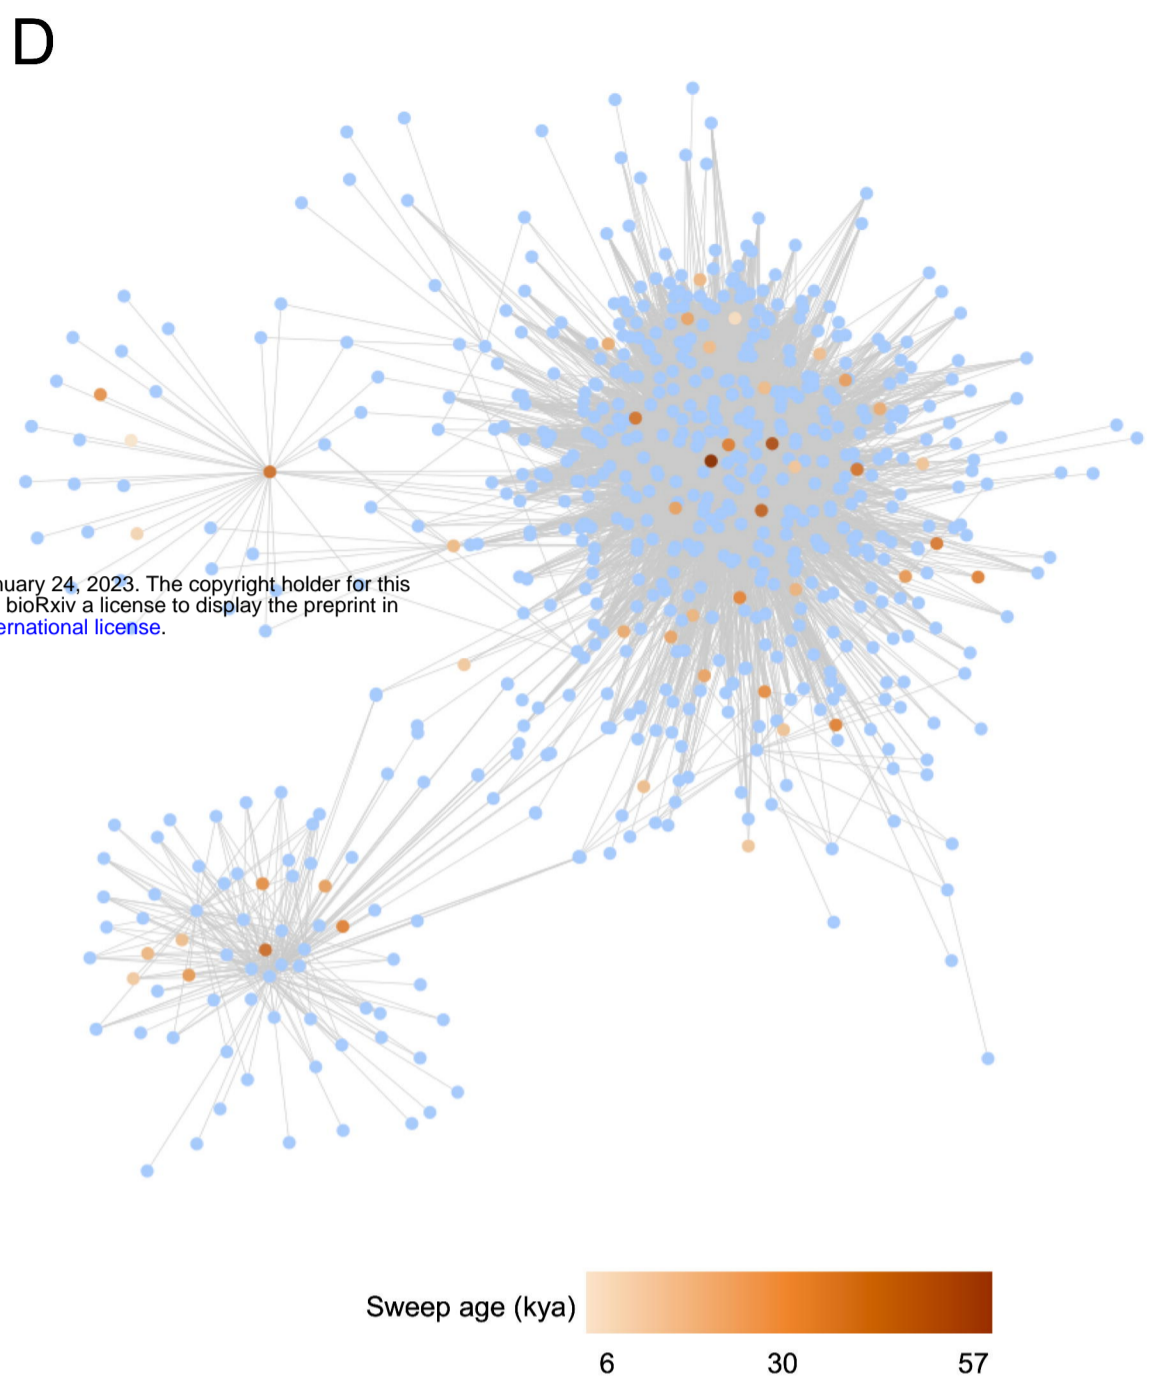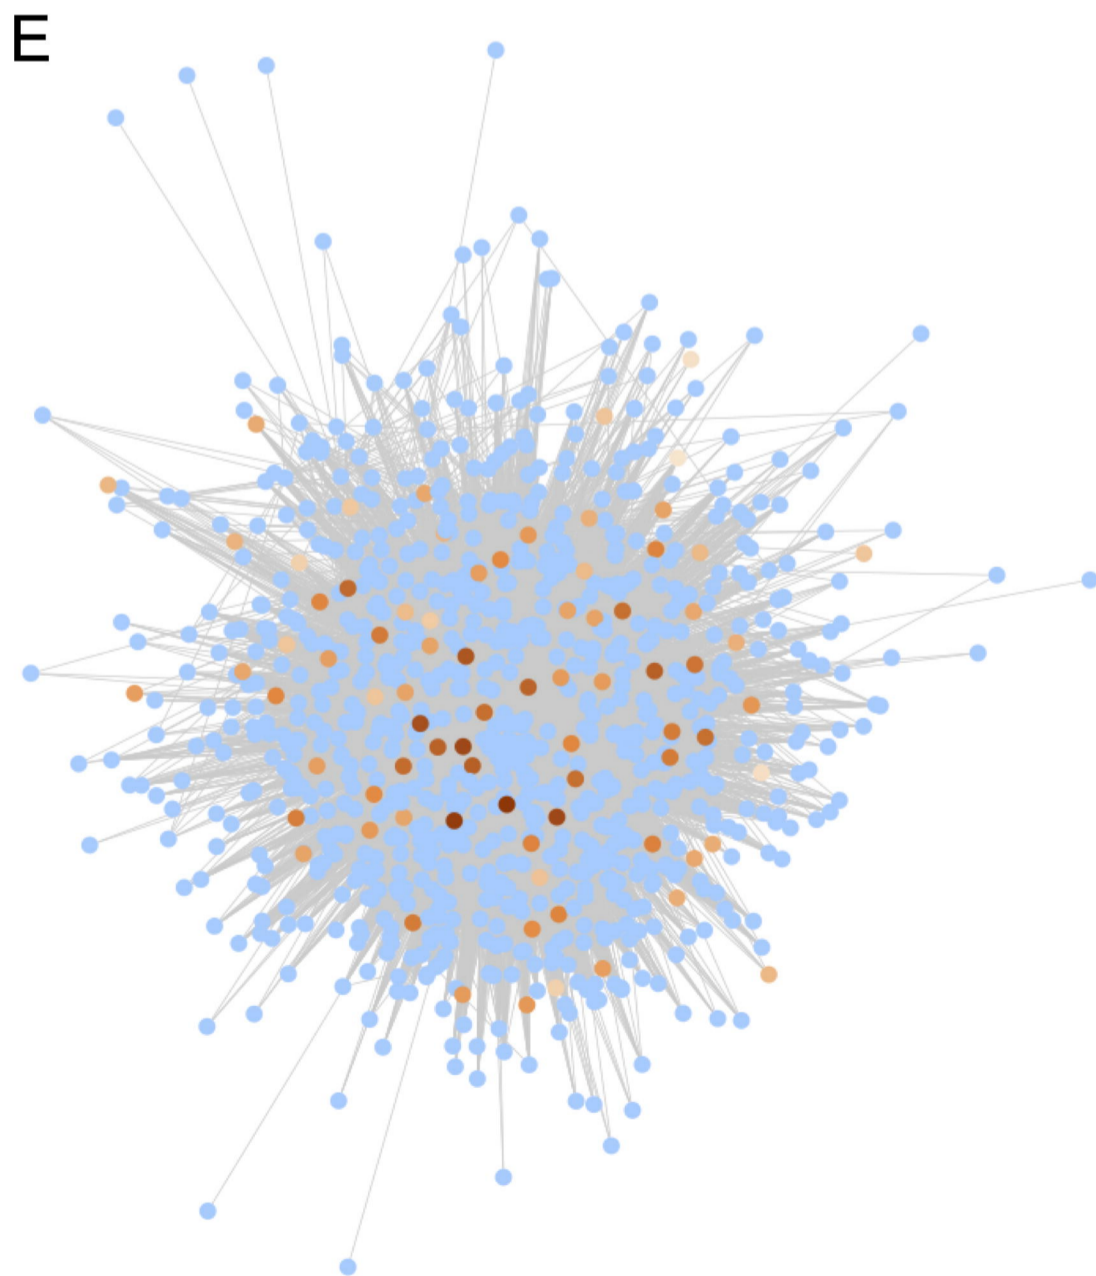

Source: https://www.biorxiv.org/content/10.1101/2023.01.18.524537v2.full.pdf
